# Supplementary material for: Prevalence of anxiety and depressive symptoms among medical residents in Tunisia: a cross-sectional survey
Source: PubMed Central journal article supplement — BMJ Open. 2018 Jul 23;8(7):e020655. doi: 10.1136/bmjopen-2017-020655 (PMC6059333; doi:10.1136/bmjopen-2017-020655), 2018-07-23
Supplement: bmjopen-2017-020655.draft_revisions.pdf [file bmjopen-2017-020655.draft_revisions.pdf]

# BMJ Open

BMJ Open is committed to open peer review. As part of this commitment we make the peer review history of every article we publish publicly available.

When an article is published we post the peer reviewers' comments and the authors' responses online. We also post the versions of the paper that were used during peer review. These are the versions that the peer review comments apply to.

The versions of the paper that follow are the versions that were submitted during the peer review process. They are not the versions of record or the final published versions. They should not be cited or distributed as the published version of this manuscript.

BMJ Open is an open access journal and the full, final, typeset and author-corrected version of record of the manuscript is available on our site with no access controls, subscription charges or pay-per-view fees (<http://bmjopen.bmj.com>).

If you have any questions on BMJ Open's open peer review process please email [info.bmjopen@bmj.com](mailto:info.bmjopen@bmj.com)

# BMJ Open

## Prevalence of Anxiety and Depressive Symptoms among Medical Residents in Tunisia: A Cross-Sectional survey

|                               |                                                                                                                                                                                                                                                                                                                                                                                                      |
|-------------------------------|------------------------------------------------------------------------------------------------------------------------------------------------------------------------------------------------------------------------------------------------------------------------------------------------------------------------------------------------------------------------------------------------------|
| Journal:                      | <i>BMJ Open</i>                                                                                                                                                                                                                                                                                                                                                                                      |
| Manuscript ID                 | bmjopen-2017-020655                                                                                                                                                                                                                                                                                                                                                                                  |
| Article Type:                 | Research                                                                                                                                                                                                                                                                                                                                                                                             |
| Date Submitted by the Author: | 15-Nov-2017                                                                                                                                                                                                                                                                                                                                                                                          |
| Complete List of Authors:     | Marzouk, Mehdi; CHU F.Bourguiba, Intensive Care; Centre Hospitalier de Bethune, Nord pas-de-calais<br>Ouanes-Besbes, Lamia; CHU F.Bourguiba Monastir, Intensive Care Med<br>Ouanes, Islem; CHU Fattouma Bourguiba, ICU<br>Dachraoui, Fahmi; CHU F.Bourguiba, Intensive Care Department<br>Hammouda, Zeineb; CHU F.Bourguiba , Intensive Care<br>Abroug, Fekri; CHU Fatouma Bourguiba, Intensive Care |
| Keywords:                     | EDUCATION & TRAINING (see Medical Education & Training), Human resource management < HEALTH SERVICES ADMINISTRATION & MANAGEMENT, MEDICAL EDUCATION & TRAINING                                                                                                                                                                                                                                       |
|                               |                                                                                                                                                                                                                                                                                                                                                                                                      |

SCHOLARONE™  
Manuscripts

Peer Review Only

1  
2  
3 1 **Prevalence of Anxiety and Depressive Symptoms among Medical Residents in**  
4 2 **Tunisia: A Cross-Sectional survey**

5  
6 3 Mehdi Marzouk<sup>1</sup> (MD), Lamia Ouanes-Besbes<sup>1</sup> (MD), Islem Ouanes<sup>1</sup> (MD), Fahmi Dachraoui<sup>1</sup>  
7 4 (MD), Zeineb Hammouda<sup>1</sup> (MD), Fekri Abroug<sup>1</sup> (MD)

8  
9  
10 5 **Authors' affiliation :**

11  
12 6 <sup>1</sup> Intensive Care Department, Teaching Hospital, Fatouma Bourguiba ; 5000 Monastir.  
13 7 Tunisia

14  
15 8

16  
17 9 **Funding:** This research received no specific grant from any funding agency in the public,  
18 10 commercial or not-for-profit sectors

19  
20  
21 11 **Competing interest:** none declared

22  
23 12

24  
25 13 **Correspondence:**

26  
27 14 Fekri Abroug

28  
29 15 Intensive Care Department

30  
31 16 CHU F.Bourguiba. Monastir. 5000 Tunisia

32  
33 17 [f.abroug@rns.tn](mailto:f.abroug@rns.tn)

34  
35 18

36  
37 19

38  
39 20

1  
2  
3 21 **Abstract:**

4  
5 22 **Objective:** assess the prevalence of anxiety and depressive symptoms in Tunisian residents  
6 23 and associated risk factors.

7  
8 24 **Design:** cross-sectional survey

9  
10 25 **Setting:** Faculty of Medicine, Tunis

11  
12 26 **Participants:** all Tunisian residents willing to choose their next 6-month rotation

13  
14 27 **Intervention:** the items of the Hospital Anxiety and Depression score (HAD) questionnaire  
15 28 was employed to capture the prevalence of anxiety and/or depression among residents.  
16 29 Statistical relationships between anxiety and depression, and socio-demographic and work-  
17 30 related data were explored by Poisson regression.

18  
19 31 **Results:** 1,700 out of 2,200 (77%) medical residents (median age:28 years, female: 60.8%)  
20 32 answered the questionnaire. The median working hours per week were 60 [IQR: 48;76]; 73%  
21 33 ensured a median 6 [IQR: 4;7] night shifts per month; only 8% could benefit from  
22 34 compensatory rest. Overall, 74.1% of participating residents had either, definite (43.6%) or  
23 35 doubtful (30.5%) anxiety, while 62% had definite (30.5%) or doubtful (31.5%) depression  
24 36 symptoms, with 20% having both. Symptoms of anxiety-depression were significantly  
25 37 associated with resident's age (OR= 1.014; 95%CI:1.006-1.023, p= 0.001); female gender  
26 38 (OR= 1.114;95%CI: 1.083-1.145, p<0.0001); and the heavy burden of work imposed on a  
27 39 weekly or monthly basis, as reflected by night shift number per month (OR= 1.048;95%CI,  
28 40 1.016-1.082, p= 0.03), worked hours per week (OR= 1.008;95%CI:1.005-1.011, p<0.0001).  
29 41 Compared to medical specialties, the generally accepted difficult specialties (surgical or  
30 42 medical-surgical) were associated with higher HAD scale (OR= 1.459;95%CI: 1.172-1.816, p=  
31 43 0.001).

32  
33  
34  
35 44 **Conclusion:** Tunisian residents experience a rate of anxiety/depression substantially higher  
36 45 than that reported at the international level. This phenomenon is worrying as it usually lasts  
37 46 beyond the residency years, and is also a source of an increase in medical errors, work  
38 47 dissatisfaction and attrition.

39  
40 48

41  
42  
43 49 **Strengths and limitations of this study:**

44  
45 50 First study to assess the prevalence of Anxiety/Depression among Tunisian residents

46  
47 51 Provides insights into associated socio-demographic and work-related variables

48  
49 52 The large participation rate

50  
51 53 The HAD questionnaire is in French (but this language is well mastered by Tunisian residents)

52  
53 54 No information on the rates of mood disorders in the general Tunisian population for  
54 55 comparison

55  
56 56 No assessment of the prevalence of Burnout syndrome

1  
2  
3 57 The increasing exposure of physicians to stressful situations is a global phenomenon without  
4 58 distinction between age, sex, or level of advancement in the profession[1-4]. Only a few  
5 59 variables inherent in the personalities, or in work-related strain, are able to modulate the  
6 60 expression of this stress by attenuating or exaggerating the generated mood disorders  
7 61 (anxiety, depression, burn out), and their impact on the personal and professional life[5 6].  
8 62 These disorders may hamper the physician's professional performance by affecting the  
9 63 concentration at work, and the quality of provided healthcare services, and provoking  
10 64 conflicts with patients or their families, or with colleagues, [7-9]. They are also associated  
11 65 with a higher substance use and abuse, divorce, and even more suicidal ideations [9 10] [11].  
12 66 Medical residents seem at increased risk of developing mental disorders [7 12-14]. A recent  
13 67 systematic review reported a 28.8% pooled prevalence of depression or depressive  
14 68 symptoms in medical residents, with a wide variation in the rate (20.9% and 43.2%)  
15 69 depending on the instrument used[15]. In countries with socio-economic conditions similar  
16 70 to those of Tunisia, the prevalence of depressive symptoms in medical residents  
17 71 ranges from 17% in India to 48% in Argentina[16-18]

18  
19  
20  
21  
22  
23  
24  
25  
26  
27  
28  
29  
30 72 Tunisia is a country that is currently experiencing major socio-economic and political  
31 73 mutations as a consequence of the so-called "Jasmine revolution" which was in 2011 the  
32 74 spark that ignited the whole region during the "Arabic spring". These mutations have  
33 75 particularly altered the relationship between the main body of the society and the medical  
34 76 profession, the latter being perceived by a large part of the population as a body of  
35 77 privileged, insufficiently empathic, and little concerned by the misfortunes of the population.  
36 78 The assaults against doctors, particularly in public hospitals and their emergency services,  
37 79 malpractice suits and prosecutions, are now very frequent, and are highly publicized on a  
38 80 daily basis on the various media in the country. Moreover, public hospitals experienced just  
39 81 after the revolution a sharp deterioration in the resources and staff made available, together  
40 82 with an alteration of their governance, which paralleled that of the public health sector. This  
41 83 situation has greatly frustrated the population, in particular the citizens who cannot afford  
42 84 the private medical sector and its large out-of-pocket costs.

1  
2  
3 85 Among the medical profession, the young Tunisian residents are considered the pillar of  
4 86 these public hospitals. Residents are the only physicians present at the hospital at night, on  
5  
6 87 weekends, and on holidays.  
7

8  
9 88 Residents come to term of a long, demanding, and selective course of studies. The  
10  
11 89 typical resident must have passed his baccalaureate among the first ranked ones, be among  
12  
13 90 the "happy few" who enter the medical school after a draconian selection, and successfully  
14  
15 91 undergo a final residency contest usually after 2 to 3 attempts (Annual pass rate = 25%).  
16  
17 92 Aged at least 26, the resident faces the reality of the public hospital, where he is exposed to  
18  
19 93 stress resulting from non-optimal exercise conditions: the need to meet his professional  
20  
21 94 duties set by his supervisors, and the growing demand of the population.

22  
23 95 We hypothesized that the combination of all of these unfavorable circumstances for  
24  
25 96 professional fulfillment, should result in a high level of mood disorders in medical residents.  
26  
27 97 We conducted a large cross-sectional survey to address the prevalence in Tunisian residents  
28  
29 98 of anxiety and depressive symptoms and highlight associated risk factors.  
30

31  
32  
33  
34  
35  
36  
37  
38  
39  
40  
41  
42  
43  
44  
45  
46  
47  
48  
49  
50  
51  
52  
53  
54  
55  
56  
57  
58  
59  
60

99

1  
2  
3 **100 Patients-Methods**

4  
5 **101 Participants** : In Tunisia, specialization in medicine takes place at the end of general medical  
6  
7 102 studies accomplished in one of the 4 faculties of medicine in the country. Doctors who wish  
8  
9 103 to specialize do so following a national contest, bringing together the candidates from the  
10  
11 104 four faculties of medicine. This contest is very selective, and takes place over three days. It  
12  
13 105 consists in more than 300 questions (multiple choice, short answer), covering separately  
14  
15 106 each of the following areas: medical specialties, surgical specialties, and basic sciences.  
16  
17 107 More than 1,500 candidates participate annually, for about 500 elected members, who are  
18  
19 108 ranked consecutively in order of merit. The choice of the specialty is then made according to  
20  
21 109 the rank of success in the contest, on a number of posts that is equal to the number of  
22  
23 110 candidates, and distributed among all the medical specialties by quotas which are fixed  
24  
25 111 according to the needs of the country in doctors practicing in medical specialties. The  
26  
27 112 internship periods (of 6 months each) and their distribution between specialties, in order to  
28  
29 113 validate a given specialty, are specified in advance by the college of each specialty. Every six  
30  
31 114 months, all trainee residents in the country (more than 2,000) gather over ten days at the  
32  
33 115 Faculty of Medicine of Tunis, the Tunisian capital, to choose the next 6-month rotation.  
34  
35 116 Within the chosen specialty, the candidate chooses according to seniority first, and his  
36  
37 117 classification in the corresponding level afterwards.

38  
39 118 **Protocol**: The study protocol was approved by the local Institutional Review Board of  
40  
41 119 Fatouma Bourguiba Teaching Hospital, Monastir (reference #2013/108). All the medical  
42  
43 120 residents gathered at the faculty of medicine of Tunis, between December 14 and December  
44  
45 121 22, 2015 for the choice of the next 6 month-rotation, were invited to answer an anonymous,  
46  
47 122 self-administered questionnaire. The questionnaire covers their civil and marital status, the  
48  
49 123 specialty chosen, their level of advancement in the specialty (duration 4 years for medical  
50  
51 124 specialties and 5 years for surgical specialties), and items of the Hospital Anxiety and  
52  
53 125 Depression score (HAD) questionnaire. On this specific date, the first level residents were the  
54  
55 126 new candidates of the very recent residency contest and for the record, the 2015 residency  
56  
57 127 contest' results were published on 17th December 2015 just 48 hours before an irreversible  
58  
59 128 choice, which engages for lifetime.

60  
61 129 Each residency level includes a number of residents between 300 and 600 and the operation  
62  
63 130 of choice begins at 9am and lasts until 5pm.

1  
2  
3 131 A resident of our unit (MM) waited at the exit of the choice' lecture room to distribute the  
4 132 questionnaire to the residents who accepted to participate anonymously after they had just  
5  
6 133 finished their choice operation.  
7

8  
9 134 **Measurements :** The questionnaire explored three fields: socio-demographic data, work-  
10 135 related characteristics, and HAD score.  
11

12  
13 136 *Socio-demographic* information concerned the gender, age, marital status, number of  
14 137 dependent children if married or divorced.  
15

16  
17 138 *Work-related characteristics* included specialty, the level achieved so far in the specific  
18 139 curriculum of each specialty, the number of shifts per month, working hours per week, and  
19 140 the presence or not of compensatory rest. For the statistical analysis purpose, specialties  
20 141 were split into four groups according to their degree of difficulty: medical (example  
21 142 dermatology, pulmonology, rheumatology, fundamental specialties like histology, physiology  
22 143 etc...) ; medical and surgical (example: ophthalmology, gynecology-obstetrics,  
23 144 otorhinolaryngology etc...); difficult medical specialties (example: critical care medicine,  
24 145 emergency medicine, cardiology), and difficult surgical specialties (neurosurgery,  
25 146 cardiovascular surgery etc).  
26  
27  
28  
29  
30  
31  
32

33 147 *The survey tool* used in our study was Hospital Anxiety and Depression score (HAD) scale that  
34 148 was developed by Zigmond & Snaith [19]. It is a brief questionnaire (containing 14 items),  
35 149 and was originally designed to detect emotional disturbances in non-psychiatric patients  
36 150 treated at hospital clinics. It is a self-report rating scale designed to measure both anxiety  
37 151 and depression. It consists of two subscales, each containing seven items on a 4-point Likert  
38 152 scale (ranging from 0-3). HAD is scored by summing the ratings for the 14 items to yield a  
39 153 total score, and by summing the ratings for the 7 items of each subscale to yield separate  
40 154 scores for anxiety and depression. Two cutoff scores are validated for detecting anxiety and  
41 155 depression, namely 8 for doubtful cases and 11 for actual cases.  
42  
43  
44  
45  
46  
47  
48

49 156 The survey was written in French and self-completed by each resident who has agreed to  
50 157 participate in the study, the residents having a perfect mastery of French, the language in  
51 158 which all medical studies are carried out in Tunisia. The total for depression, anxiety  
52 159 subscales the whole HAD scale were calculated by a resident from our unit.  
53  
54  
55

56 160 **Statistical analysis :**  
57  
58  
59  
60



1  
2  
3 161 The study design focused on determination of the number of residents who meet the criteria  
4 162 for anxiety and depression. Continuous parameters are expressed as medians and inter-  
5 163 Quartile Ranges (IQR). The dichotomous variables are expressed as numbers and  
6 164 percentages. Adjusted Odds Ratios (ORs) and 95% Confidence Intervals (CIs) for each  
7 165 variable were calculated.

8  
9  
10  
11  
12 166 Prevalence of anxiety and depression were calculated and correlated to socio-demographic  
13 167 and work-related characteristics. Chi-square tests were carried out to compare the  
14 168 prevalence of anxiety and depression between groups. Multivariable Poisson regression was  
15 169 used to assess risk factors associated with anxiety and depression cases.

16  
17  
18  
19  
20 170 *p*-values less than 0.05 were considered statistically significant. All statistical procedures  
21 171 were performed using IBM SPSS Statistics 21.0 software.

22  
23  
24 172

25  
26 173

27  
28  
29 174

30  
31 175

32  
33 176

34  
35 177

36  
37 178

38  
39 179

40  
41 180

42  
43 181

44  
45 182  
46  
47  
48  
49  
50  
51  
52  
53  
54  
55  
56  
57  
58  
59  
60

1  
2  
3 **183 Results:**  
4

5  
6 **184** During the study-period corresponding to December 14<sup>th</sup> to December 22<sup>nd</sup> 2015, 1700 out  
7  
8 **185** of 2200 (77%) medical residents willingly answered the proposed questionnaire. They had a  
9  
10 **186** median age of 28 years [IQR: 27; 30] with a predominance of the female gender (60.8%);  
11  
12 **187** 40% were married, of whom 20% had at least one child (Table I).

13  
14 **188** Tunisian Residents from all levels and different specialties answered the survey. Residents  
15  
16 **189** declared they used to work for a median of 60 hours [IQR : 48 ; 76] per week. 73% (1239)  
17  
18 **190** among them ensured night shifts with a median number of 6 [IQR : 4 ; 7] per month; only 8%  
19  
20 **191** (98) of these could benefit from compensatory rest. (Table I).

21  
22 **192** The median HAD score amounted to 19 [IQR: 14 ; 23], split on the anxiety subscale (HAD-A) :  
23  
24 **193** 10 [IQR: 7 ; 12], and the depression subscale (HAD-B): 9 [IQR: 6 ; 11].

25  
26 **194** Overall, 742 (43.6%) residents reached the cut-off defining definite anxiety state (ie a score  
27  
28 **195**  $\geq 11$ ), and 519 (30.5%) reached the scale level defining definite depression. Out of these  
29  
30 **196** residents, 342 (20%) had both anxiety and depression. In the remaining, the prevalence of  
31  
32 **197** doubtful anxiety score (ie a score  $\geq 8$ ) was 30.5%, and that of doubtful depression was 31.5%.

33  
34 **198** Tables II and III depict the association between demographic and workload characteristics,  
35  
36 **199** and the occurrence of anxiety or depression, respectively.

37  
38 **200** Age, female gender (66.7% Vs. 56.2%,  $p < 0.0001$ ) and marital status (42% Vs. 36.7%,  $p =$   
39  
40 **201** 0.027) were significantly associated with definite cases of anxiety (HAD-A  $\geq 11$ ) compared to  
41  
42 **202** negative or doubtful ones (HAD-A  $< 11$ ). The fifth level of residency course (13.9% vs. 9.7%,  $p$   
43  
44 **203** = 0.009), and the choice of medical/surgical specialties (15.9% Vs. 10.8%,  $p = 0.002$ ) were  
45  
46 **204** also significantly associated with anxiety. Medical specialties (45% Vs. 54.2%,  $p < 0.0001$ )  
47  
48 **205** were on the contrary associated with a lower risk of developing anxiety symptoms (Table II).

49  
50 **206** For definite depressive cases (HAD-D  $\geq 11$ ) compared to negative and doubtful ones (HAD-D  
51  
52 **207**  $< 11$ ), age, marital status (45.7% Vs. 36.2%,  $p < 0.0001$ ) were significantly different between  
53  
54 **208** the two groups. Moreover, difficult surgical specialties (22.9% Vs. 17.5%,  $p = 0.011$ ) were  
55  
56 **209** significantly associated with depressive symptoms in contrast to medical specialties (44.7 Vs.  
57  
58 **210** 52.6%,  $p = 0.003$ ) which were associated with lower depressive symptoms (Table III).

59  
60 **211** The number of shifts per month, and working hours per month were associated with both  
**212** probable anxiety and depressive cases (Table II and III).

1  
2  
3 213 The Poisson regression analysis disclosed the following variables as associated with HAD  
4 214 score: age (OR = 1.014, 95% CI, 1.006-1.023, p = 0.001); female gender (OR = 1.114, 95% CI,  
5 215 1.083-1.145, p <0.0001); night shift number per month (OR = 1.048, 95% CI, 1.016-1.082, p =  
6 216 0.03), working hours per week (OR = 1.008, 95% CI, 1.005-1.011, p = <0.0001) . Compared  
7 217 with medical specialties, medico-surgical ones (OR = 1.459, 95% CI, 1.172-1.816, p = 0.001)  
8 218 were independently associated with higher HAD scale (fig 1).  
9  
10  
11  
12  
13  
14  
15  
16  
17  
18  
19  
20  
21  
22  
23  
24  
25  
26  
27  
28  
29  
30  
31  
32  
33  
34  
35  
36  
37  
38  
39  
40  
41  
42  
43  
44  
45  
46  
47  
48  
49  
50  
51  
52  
53  
54  
55  
56  
57  
58  
59  
60

219

220

221

222

223

For peer review only

## 224 Discussion

225 This large survey encompassing 1700 out of the 2200 Tunisian residents involved in  
226 the periodic process of choosing internship positions in their specialties, shows that 74.1% of  
227 them fulfilled the criteria of either definite (43.6%) or doubtful (30.5%) anxiety, while 62% of  
228 them had either definite (30.5%) or doubtful (31.5%) depression symptoms. In 20% there  
229 were both symptoms of anxiety and depression. Symptoms of anxiety-depression were  
230 significantly associated with age, female sex, and the heavy burden of work imposed on a  
231 weekly or monthly basis as reflected by the weekly working hours, the night-shift number  
232 per month, and the choice of a specialty generally accepted as a difficult one (surgical or  
233 medical-surgical specialty compared to medical specialty).

234 Of interest, the system of work revealed in this survey is very demanding, since the average  
235 working hours per week (60 hours), and the number of night shifts per month (6 on average  
236 regardless of the type of specialty) most often without compensatory rest, are extremely  
237 high.

238 Although, mood disorders and physician distress such as burnout syndrome, depression, and  
239 anxiety are admitted as both, more prevalent among caregivers compared to general  
240 population, and a devastating situation in this particular population, information about their  
241 prevalence in Tunisia is scarce, both in the general population and in physicians [5 20 21]. In  
242 this first survey on the subject in our country, we succeeded to enroll 77% of potentially  
243 concerned residents, yielding a picture that could be considered both large and accurate  
244 snapshot of the actual situation of a corporate representing the real backbone of the public  
245 health system in Tunisia. The use of the French version of the HAD questionnaire should not  
246 be considered as a potential bias, as medical studies are conducted in French which is  
247 perfectly mastered by all Tunisian residents.

248 Benchmarking the rates of moods disorders observed in young physicians with those  
249 prevailing in the general Tunisian population is not easy since we are unaware of studies  
250 assessing anxiety and depression rates among general Tunisian population, but international  
251 studies stressed the fact that residents usually have higher rates of depression than the  
252 general population [15 22]. Estimates of the prevalence of depression or depressive  
253 symptoms among resident physicians vary from 3% to 60%, whereas a recent meta-analysis  
254 yielded an overall pooled prevalence of depression or depressive symptoms of 28.8%

1  
2  
3 255 rendering the definite or doubtful diagnosis rate of depression observed in our study very  
4 256 high in comparison to the median rate at the international level[15].  
5  
6

7 257 Resident physicians share the same known causes of depression than the general  
8  
9 258 population: physical health, lifestyle, marital status, history of previous depression,  
10 259 childhood, religiosity etc... They have in addition specific factors pertaining to the work  
11  
12 260 organisation and the development of their career [4]. These risk-factors correspond to the  
13  
14 261 difficulty of their specialty, postgraduate year, stress at work, current rotation difficulty,  
15  
16 262 working hours, shift number etc...[4 15 23]. In our study the Poisson regression model  
17  
18 263 disclosed the following items as statistically associated with the occurrence of anxiety-  
19  
20 264 depression: age, female sex, practice of a specialty generally accepted as a difficult one, and  
21  
22 265 the heavy burden of work imposed on a weekly or monthly basis as reflected by the weekly  
23  
24 266 working hours, and the night-shift number per month. Most of these risk-factors have been  
25  
26 267 reported elsewhere, or are intuitive, but it is their magnitude that makes the originality, and  
27  
28 268 intrigue in our study

29  
30 269 The occurrence of depression should be considered as a major event in the young  
31  
32 270 physician career or even life. It is indeed about a long-lasting phenomenon, as it has been  
33  
34 271 shown that once present, depression as well as burnout is prone to persist throughout the  
35  
36 272 whole residency duration, or even beyond [24 25]. In a nationwide survey involving 3500  
37  
38 273 Canadian physicians, Sullivan et al reported that 55% found that medicine as a profession  
39  
40 274 impacted negatively their family and personal life, whereas 65% reported that opportunities  
41  
42 275 to change career despite dissatisfaction were limited [26]

43  
44 276 Depression is also a source of decreased concentration at work, an increase in the rate of  
45  
46 277 medical error, work dissatisfaction and conflicts, impaired sleep quality, and a greater  
47  
48 278 propensity to attrition[7 27 28]. Hence, every effort aiming at improving the mental health  
49  
50 279 of young physicians should be encouraged. This begins by acting on the risk factors  
51  
52 280 associated with anxiety and depression in this specific population.

53  
54 281 The resident physician should first be aware of the mental problem and seek help. We did  
55  
56 282 not investigate whether the participating residents sought for or actually had psychological  
57  
58 283 counseling, but we strongly believe that most did not. Residents' careers and the pace of  
59  
60 284 work should also be better managed. Some measures could be immediate such as a

1  
2  
3 285 compensatory rest after the night shifts. Others require the restoration of trust with the  
4 286 population, a better governance of the health system, objectives that seem very difficult to  
5  
6 287 achieve in the current political and social climate in the country.  
7

8  
9 288  
10  
11  
12  
13  
14  
15  
16  
17  
18  
19  
20  
21  
22  
23  
24  
25  
26  
27  
28  
29  
30  
31  
32  
33  
34  
35  
36  
37  
38  
39  
40  
41  
42  
43  
44  
45  
46  
47  
48  
49  
50  
51  
52  
53  
54  
55  
56  
57  
58  
59  
60

For peer review only

1  
2  
3 289 **Legend Figure1:** Risk Factors associated with Total HAD Score  
4

5 290 **Authors' contributions**  
6

7 291 Study Concept and design: MM and FA; Data Acquisition: MM; Analysis and interpretation of  
8 292 the data: MM, LOB, ZH, IO, FD, FA; All authors read and approved the final manuscript. MM  
9 293 and FA had full access to the data and take responsibility for its integrity and the accuracy of  
10 294 the analyses.  
11  
12

13 295 **Acknowledgements:** The authors are indebted to Pr Mahmoud Bchir for the Language  
14 296 editing of the manuscript  
15

16  
17 297 **Data Sharing statement:** dataset is available by contacting FA at f.abroug@rns.tn  
18

19 298  
20 299  
21  
22  
23  
24  
25  
26  
27  
28  
29  
30  
31  
32  
33  
34  
35  
36  
37  
38  
39  
40  
41  
42  
43  
44  
45  
46  
47  
48  
49  
50  
51  
52  
53  
54  
55  
56  
57  
58  
59  
60

300 **References**

- 301 1. Shanafelt TD, Sloan JA, Habermann TM. The well-being of physicians. *Am J*  
302 *Med* 2003;**114**(6):513-9
- 303 2. Hsu K, Marshall V. Prevalence of depression and distress in a large sample of  
304 Canadian residents, interns, and fellows. *Am J Psychiatry*  
305 1987;**144**(12):1561-6 doi: 10.1176/ajp.144.12.1561[published Online  
306 First: Epub Date]].
- 307 3. Rotenstein LS, Ramos MA, Torre M, et al. Prevalence of Depression,  
308 Depressive Symptoms, and Suicidal Ideation Among Medical Students: A  
309 Systematic Review and Meta-Analysis. *JAMA* 2016;**316**(21):2214-36 doi:  
310 10.1001/jama.2016.17324[published Online First: Epub Date]].
- 311 4. Joules N, Williams, D. and Thompson, A. Depression in Resident Physicians: A  
312 Systematic Review. . *Open Journal of Depression* 2014;**3**:898-100 doi:  
313 10.4236/ojd.2014.33013. [published Online First: Epub Date]].
- 314 5. Sen S, Kranzler HR, Krystal JH, et al. A prospective cohort study investigating  
315 factors associated with depression during medical internship. *Arch Gen*  
316 *Psychiatry* 2010;**67**(6):557-65 doi:  
317 10.1001/archgenpsychiatry.2010.41[published Online First: Epub Date]].
- 318 6. Rama-Maceiras P, Jokinen J, Kranke P. Stress and burnout in anaesthesia: a  
319 real world problem? *Curr Opin Anaesthesiol* 2015;**28**(2):151-8 doi:  
320 10.1097/ACO.000000000000169[published Online First: Epub Date]].
- 321 7. Fahrenkopf AM, Sectish TC, Barger LK, et al. Rates of medication errors  
322 among depressed and burnt out residents: prospective cohort study.  
323 *BMJ* 2008;**336**(7642):488-91 doi:  
324 10.1136/bmj.39469.763218.BE[published Online First: Epub Date]].
- 325 8. Tsai YC, Liu CH. Factors and symptoms associated with work stress and  
326 health-promoting lifestyles among hospital staff: a pilot study in Taiwan.  
327 *BMC health services research* 2012;**12**:199 doi: 10.1186/1472-6963-12-  
328 199[published Online First: Epub Date]].
- 329 9. de Oliveira GS, Jr., Chang R, Fitzgerald PC, et al. The prevalence of burnout  
330 and depression and their association with adherence to safety and  
331 practice standards: a survey of United States anesthesiology trainees.  
332 *Anesth Analg* 2013;**117**(1):182-93 doi:  
333 10.1213/ANE.0b013e3182917da9[published Online First: Epub Date]].
- 334 10. Lebensohn P, Dodds S, Benn R, et al. Resident wellness behaviors:  
335 relationship to stress, depression, and burnout. *Family medicine*  
336 2013;**45**(8):541-9
- 337 11. van der Heijden F, Dillingh G, Bakker A, et al. Suicidal thoughts among  
338 medical residents with burnout. *Archives of suicide research : official*  
339 *journal of the International Academy for Suicide Research*



- 1  
2  
3 340 2008;**12**(4):344-6 doi: 10.1080/13811110802325349[published Online  
4 341 First: Epub Date]].
- 5 342 12. Amaddeo F, Jones J. What is the impact of socio-economic inequalities on  
6 343 the use of mental health services? *Epidemiologia e psichiatria sociale*  
7 344 2007;**16**(1):16-9
- 8 345 13. Donisi V, Tedeschi F, Percudani M, et al. Prediction of community mental  
9 346 health service utilization by individual and ecological level socio-  
10 347 economic factors. *Psychiatry research* 2013;**209**(3):691-8 doi:  
11 348 10.1016/j.psychres.2013.02.031[published Online First: Epub Date]].
- 12 349 14. Ripp J, Babyatsky M, Fallar R, et al. The incidence and predictors of job  
13 350 burnout in first-year internal medicine residents: a five-institution study.  
14 351 *Academic medicine : journal of the Association of American Medical*  
15 352 *Colleges* 2011;**86**(10):1304-10 doi:  
16 353 10.1097/ACM.0b013e31822c1236[published Online First: Epub Date]].
- 17 354 15. Mata DA, Ramos MA, Bansal N, et al. Prevalence of Depression and  
18 355 Depressive Symptoms Among Resident Physicians: A Systematic Review  
19 356 and Meta-analysis. *JAMA* 2015;**314**(22):2373-83 doi:  
20 357 10.1001/jama.2015.15845[published Online First: Epub Date]].
- 21 358 16. Waldman SV, Diez JC, Arazi HC, et al. Burnout, perceived stress, and  
22 359 depression among cardiology residents in Argentina. *Acad Psychiatry*  
23 360 2009;**33**(4):296-301 doi: 10.1176/appi.ap.33.4.296[published Online  
24 361 First: Epub Date]].
- 25 362 17. Al-Maddah EM, Al-Dabal BK, Khalil MS. Prevalence of Sleep Deprivation and  
26 363 Relation with Depressive Symptoms among Medical Residents in King  
27 364 Fahd University Hospital, Saudi Arabia. *Sultan Qaboos University medical*  
28 365 *journal* 2015;**15**(1):e78-84
- 29 366 18. Shashikantha S K SMP. Prevalence of depression among post graduate  
30 367 residents in a tertiary health care institute, Haryana. *International*  
31 368 *Journal of Medical Science and Public Health* 2016;**5**(10):2139-42
- 32 369 19. Zigmond AS, Snaith RP. The hospital anxiety and depression scale. *Acta*  
33 370 *psychiatrica Scandinavica* 1983;**67**(6):361-70
- 34 371 20. Kessler RC, Berglund P, Demler O, et al. Lifetime prevalence and age-of-  
35 372 onset distributions of DSM-IV disorders in the National Comorbidity  
36 373 Survey Replication. *Archives of general psychiatry* 2005;**62**(6):593-602  
37 374 doi: 10.1001/archpsyc.62.6.593[published Online First: Epub Date]].
- 38 375 21. Dyrbye LN, Thomas MR, Shanafelt TD. Systematic review of depression,  
39 376 anxiety, and other indicators of psychological distress among U.S. and  
40 377 Canadian medical students. *Academic medicine : journal of the*  
41 378 *Association of American Medical Colleges* 2006;**81**(4):354-73

- 1  
2  
3 379 22. Schneider SE, Phillips WM. Depression and anxiety in medical, surgical, and  
4 380 pediatric interns. *Psychol Rep* 1993;**72**(3 Pt 2):1145-6 doi:  
5 381 10.2466/pr0.1993.72.3c.1145[published Online First: Epub Date]].  
6  
7 382 23. Kirsling RA, Kochar MS, Chan CH. An evaluation of mood states among first-  
8 383 year residents. *Psychol Rep* 1989;**65**(2):355-66 doi:  
9 384 10.2466/pr0.1989.65.2.355[published Online First: Epub Date]].  
10  
11 385 24. Girard DE, Hickam DH, Gordon GH, et al. A prospective study of internal  
12 386 medicine residents' emotions and attitudes throughout their training.  
13 387 *Acad Med* 1991;**66**(2):111-4  
14  
15 388 25. Roh MS, Jeon HJ, Kim H, et al. The prevalence and impact of depression  
16 389 among medical students: a nationwide cross-sectional study in South  
17 390 Korea. *Acad Med* 2010;**85**(8):1384-90 doi:  
18 391 10.1097/ACM.0b013e3181df5e43[published Online First: Epub Date]].  
19  
20 392 26. Sullivan P, Buske L. Results from CMA's huge 1998 physician survey point to  
21 393 a dispirited profession. *CMAJ* 1998;**159**(5):525-8  
22  
23 394 27. Khoushhal Z, Hussain MA, Greco E, et al. Prevalence and Causes of Attrition  
24 395 Among Surgical Residents: A Systematic Review and Meta-analysis. *JAMA*  
25 396 *Surg* 2017;**152**(3):265-72 doi: 10.1001/jamasurg.2016.4086[published  
26 397 Online First: Epub Date]].  
27  
28 398 28. West CP, Huschka MM, Novotny PJ, et al. Association of perceived medical  
29 399 errors with resident distress and empathy: a prospective longitudinal  
30  
31 400 study. *JAMA* 2006;**296**(9):1071-8 doi:  
32 401 10.1001/jama.296.9.1071[published Online First: Epub Date]].  
33  
34 402

**Table 1 : Demographic and work characteristics of the study population (n=1700) :**

|                                          |                                   |              |
|------------------------------------------|-----------------------------------|--------------|
| <b>Sex ratio (M/F)</b>                   |                                   | 667/1033     |
| <b>Age, med [IQR]</b>                    |                                   | 28 [27 ; 30] |
| <b>Marital Status</b>                    | <b>Single, n(%)</b>               | 1036 (61)    |
|                                          | <b>Married, n(%)</b>              | 655 (38.5)   |
|                                          | <b>Divorced, n(%)</b>             | 9 (0.5)      |
| <b>Number of Children</b>                | <b>Zero, n(%)</b>                 | 343 (20.2)   |
|                                          | <b>One, n(%)</b>                  | 235 (13.8)   |
|                                          | <b>More than one, n(%)</b>        | 86 (5.1)     |
| <b>Residency Level (year)</b>            | <b>I, n(%)</b>                    | 320 (18.8)   |
|                                          | <b>II, n(%)</b>                   | 410 (24.1)   |
|                                          | <b>III, n(%)</b>                  | 434 (25.5)   |
|                                          | <b>IV, n(%)</b>                   | 340 (20)     |
|                                          | <b>V, n(%)</b>                    | 196 (11.5)   |
| <b>Specialty*</b>                        | <b>Medical, n(%)</b>              | 854 (50.2)   |
|                                          | <b>Medical and Surgical, n(%)</b> | 221 (13%)    |
|                                          | <b>Hard Medical, n(%)</b>         | 299 (17.6)   |
|                                          | <b>Hard Surgical, n(%)</b>        | 326 (19.2)   |
| <b>Night shifts per month, med [IQR]</b> |                                   | 6 [4 ; 7]    |
| <b>Working hours per week, med [IQR]</b> |                                   | 60 [48 ; 76] |
| <b>Compensatory rest, n (%)</b>          |                                   | 98 (5.7)     |

*\*Specialties were split into four categories according to everyday difficulties: medical (example dermatology, pulmonology, rheumatology, fundamental specialties like histology, physiology etc) ; medical and surgical (example: ophthalmology, gynecology-obstetrics, otorhinolaryngology etc); hard medical (example: critical care medicine, emergency medicine, cardiology), and hard surgical specialties (neurosurgery, cardiovascular surgery etc).*

**Table II : Demographic and workload characteristics and their association with anxiety :**

|                                      | No Anxiety   | Definite Anxiety |                   |
|--------------------------------------|--------------|------------------|-------------------|
| <b>n (%)</b>                         | 958 (56.4)   | 742 (43.6)       |                   |
| <b>Age, med [IQR]</b>                | 29 [28 ; 30] | 29 [28 ; 30]     | <u>0.008</u>      |
| <b>Gender</b>                        |              |                  | <u>&lt;0.0001</u> |
| <b>Male</b>                          | 420 (43.8)   | 247 (33.3)       |                   |
| <b>Female</b>                        | 538 (56.2)   | 495 (66.7)       |                   |
| <b>Marital Status</b>                |              |                  | <u>0.027</u>      |
| <b>Single</b>                        | 606 (63.3)   | 430 (58)         |                   |
| <b>Married</b>                       | 352 (36.7)   | 312 (42)         |                   |
| <b>Level of Residency</b>            |              |                  | <u>0.005</u>      |
| <b>I</b>                             | 188 (19.6)   | 132 (17.8)       |                   |
| <b>II</b>                            | 244 (25.5)   | 166 (22.4)       |                   |
| <b>III</b>                           | 251 (26.2)   | 183 (24.7)       |                   |
| <b>IV</b>                            | 182 (19)     | 158 (21.3)       |                   |
| <b>V</b>                             | 93 (9.7)     | 103 (13.9)       |                   |
| <b>Specialty</b>                     |              |                  | <u>0.018</u>      |
| <b>Medical</b>                       | 519 (54.2)   | 334 (45)         |                   |
| <b>Medical and Surgical</b>          | 103 (10.8)   | 118 (15.9)       |                   |
| <b>Hard Surgical</b>                 | 181 (18.9)   | 145 (19.5)       |                   |
| <b>Hard Medical</b>                  | 155 (16.2)   | 145 (19.5)       |                   |
| <b>Shifts/month, med [IQR]</b>       | 5 [2;7]      | 6 [5;8]          | <u>&lt;0.0001</u> |
| <b>Working Hours/week, med [IQR]</b> | 60 [40;72]   | 60 [50 ; 80]     | <u>&lt;0.0001</u> |

**Table III** : Demographic and workload characteristics and association with depression cases

|                               | No depression | Definite depression |         |
|-------------------------------|---------------|---------------------|---------|
| N (%)                         | 1181 (69.5)   | 519 (30.5)          |         |
| Age, med [IQR]                | 29 [28;30]    | 29 [28 ; 30]        | <0.0001 |
| <b>Gender</b>                 |               |                     | 0.281   |
| <b>Male</b>                   | 453 (38.4)    | 214 (41.2)          |         |
| <b>Female</b>                 | 728 (61.6)    | 305 (58.8)          |         |
| <b>Marital Status</b>         |               |                     | <0.0001 |
| <b>Single</b>                 | 754 (63.8)    | 282 (54.3)          |         |
| <b>Married</b>                | 427 (36.2)    | 237 (45.7)          |         |
| <b>Level of Residency</b>     |               |                     | <0.0001 |
| <b>I</b>                      | 263 (22.3)    | 57 (11)             |         |
| <b>II</b>                     | 292 (24.7)    | 118 (22.7)          |         |
| <b>III</b>                    | 294 (24.9)    | 140 (27)            |         |
| <b>IV</b>                     | 218 (18.5)    | 122 (23.5)          |         |
| <b>V</b>                      | 114 (9.7)     | 82 (15.8)           |         |
| <b>Specialty</b>              |               |                     | 0.962   |
| <b>Medical</b>                | 621 (52.6)    | 232 (44.7)          |         |
| <b>Medical and Surgical</b>   | 156 (13.2)    | 65 (12.5)           |         |
| <b>Hard Surgical</b>          | 207 (17.5)    | 119 (22.9)          |         |
| <b>Hard Medical</b>           | 197 (16.7)    | 103 (19.8)          |         |
| Shifts/month, med [IQR]       | 5 [3;7]       | 6 [4 ; 8]           | <0.0001 |
| Working Hours/week, med [IQR] | 60 [42;72]    | 64 [51 ; 80]        | <0.0001 |

1  
2  
3  
4  
5  
6  
7  
8  
9  
10  
11  
12  
13  
14  
15  
16  
17  
18  
19  
20  
21  
22  
23  
24  
25  
26  
27  
28  
29  
30  
31  
32  
33  
34  
35  
36  
37  
38  
39  
40  
41  
42  
43  
44  
45  
46  
47  
48  
49  
50  
51  
52  
53  
54  
55  
56  
57  
58  
59  
60

For peer review only

STROBE Statement—Checklist of items that should be included in reports of *cross-sectional studies*

|                              | Item No | Recommendation                                                                                                                                                                                               |         |
|------------------------------|---------|--------------------------------------------------------------------------------------------------------------------------------------------------------------------------------------------------------------|---------|
| <b>Title and abstract</b>    | 1       | (a) Indicate the study's design with a commonly used term in the title or the abstract                                                                                                                       | X       |
|                              |         | (b) Provide in the abstract an informative and balanced summary of what was done and what was found                                                                                                          | X       |
| <b>Introduction</b>          |         |                                                                                                                                                                                                              |         |
| Background/rationale         | 2       | Explain the scientific background and rationale for the investigation being reported                                                                                                                         | P3      |
| Objectives                   | 3       | State specific objectives, including any prespecified hypotheses                                                                                                                                             | P4      |
| <b>Methods</b>               |         |                                                                                                                                                                                                              |         |
| Study design                 | 4       | Present key elements of study design early in the paper                                                                                                                                                      | P5      |
| Setting                      | 5       | Describe the setting, locations, and relevant dates, including periods of recruitment, exposure, follow-up, and data collection                                                                              | P5      |
| Participants                 | 6       | (a) Give the eligibility criteria, and the sources and methods of selection of participants                                                                                                                  | P5      |
| Variables                    | 7       | Clearly define all outcomes, exposures, predictors, potential confounders, and effect modifiers. Give diagnostic criteria, if applicable                                                                     | P5      |
| Data sources/<br>measurement | 8*      | For each variable of interest, give sources of data and details of methods of assessment (measurement). Describe comparability of assessment methods if there is more than one group                         | P6      |
| Bias                         | 9       | Describe any efforts to address potential sources of bias                                                                                                                                                    | P5      |
| Study size                   | 10      | Explain how the study size was arrived at                                                                                                                                                                    | P5      |
| Quantitative variables       | 11      | Explain how quantitative variables were handled in the analyses. If applicable, describe which groupings were chosen and why                                                                                 |         |
| Statistical methods          | 12      | (a) Describe all statistical methods, including those used to control for confounding                                                                                                                        | P7      |
|                              |         | (b) Describe any methods used to examine subgroups and interactions                                                                                                                                          | NA      |
|                              |         | (c) Explain how missing data were addressed                                                                                                                                                                  | NA      |
|                              |         | (d) If applicable, describe analytical methods taking account of sampling strategy                                                                                                                           | NA      |
|                              |         | (e) Describe any sensitivity analyses                                                                                                                                                                        | P7      |
| <b>Results</b>               |         |                                                                                                                                                                                                              |         |
| Participants                 | 13*     | (a) Report numbers of individuals at each stage of study—eg numbers potentially eligible, examined for eligibility, confirmed eligible, included in the study, completing follow-up, and analysed            | P8      |
|                              |         | (b) Give reasons for non-participation at each stage                                                                                                                                                         | P8      |
|                              |         | (c) Consider use of a flow diagram                                                                                                                                                                           | NA      |
| Descriptive data             | 14*     | (a) Give characteristics of study participants (eg demographic, clinical, social) and information on exposures and potential confounders                                                                     | Table I |
|                              |         | (b) Indicate number of participants with missing data for each variable of interest                                                                                                                          | NA      |
| Outcome data                 | 15*     | Report numbers of outcome events or summary measures                                                                                                                                                         | P8      |
| Main results                 | 16      | (a) Give unadjusted estimates and, if applicable, confounder-adjusted estimates and their precision (eg, 95% confidence interval). Make clear which confounders were adjusted for and why they were included | P8      |

|                          |    |                                                                                                                                                                            |        |
|--------------------------|----|----------------------------------------------------------------------------------------------------------------------------------------------------------------------------|--------|
|                          |    | (b) Report category boundaries when continuous variables were categorized                                                                                                  | P8     |
|                          |    | (c) If relevant, consider translating estimates of relative risk into absolute risk for a meaningful time period                                                           | NA     |
| Other analyses           | 17 | Report other analyses done—eg analyses of subgroups and interactions, and sensitivity analyses                                                                             | P8     |
| <b>Discussion</b>        |    |                                                                                                                                                                            |        |
| Key results              | 18 | Summarise key results with reference to study objectives                                                                                                                   | P10    |
| Limitations              | 19 | Discuss limitations of the study, taking into account sources of potential bias or imprecision. Discuss both direction and magnitude of any potential bias                 | P10    |
| Interpretation           | 20 | Give a cautious overall interpretation of results considering objectives, limitations, multiplicity of analyses, results from similar studies, and other relevant evidence | P10-11 |
| Generalisability         | 21 | Discuss the generalisability (external validity) of the study results                                                                                                      | P11    |
| <b>Other information</b> |    |                                                                                                                                                                            |        |
| Funding                  | 22 | Give the source of funding and the role of the funders for the present study and, if applicable, for the original study on which the present article is based              | P1     |

\*Give information separately for exposed and unexposed groups.

**Note:** An Explanation and Elaboration article discusses each checklist item and gives methodological background and published examples of transparent reporting. The STROBE checklist is best used in conjunction with this article (freely available on the Web sites of PLoS Medicine at <http://www.plosmedicine.org/>, Annals of Internal Medicine at <http://www.annals.org/>, and Epidemiology at <http://www.epidem.com/>). Information on the STROBE Initiative is available at [www.strobe-statement.org](http://www.strobe-statement.org).



# BMJ Open

## Prevalence of Anxiety and Depressive Symptoms among Medical Residents in Tunisia: A Cross-Sectional survey

|                                 |                                                                                                                                                                                                                                                                                                                                                                                                      |
|---------------------------------|------------------------------------------------------------------------------------------------------------------------------------------------------------------------------------------------------------------------------------------------------------------------------------------------------------------------------------------------------------------------------------------------------|
| Journal:                        | <i>BMJ Open</i>                                                                                                                                                                                                                                                                                                                                                                                      |
| Manuscript ID                   | bmjopen-2017-020655.R1                                                                                                                                                                                                                                                                                                                                                                               |
| Article Type:                   | Research                                                                                                                                                                                                                                                                                                                                                                                             |
| Date Submitted by the Author:   | 04-Apr-2018                                                                                                                                                                                                                                                                                                                                                                                          |
| Complete List of Authors:       | Marzouk, Mehdi; CHU F.Bourguiba, Intensive Care; Centre Hospitalier de Bethune, Nord pas-de-calais<br>Ouanes-Besbes, Lamia; CHU F.Bourguiba Monastir, Intensive Care Med<br>Ouanes, Islem; CHU Fattouma Bourguiba, ICU<br>Hammouda, Zeineb; CHU F.Bourguiba , Intensive Care<br>Dachraoui, Fahmi; CHU F.Bourguiba, Intensive Care Department<br>Abroug, Fekri; CHU Fatouma Bourguiba, Intensive Care |
| <b>Primary Subject Heading</b>: | Medical education and training                                                                                                                                                                                                                                                                                                                                                                       |
| Secondary Subject Heading:      | Mental health                                                                                                                                                                                                                                                                                                                                                                                        |
| Keywords:                       | EDUCATION & TRAINING (see Medical Education & Training), Human resource management < HEALTH SERVICES ADMINISTRATION & MANAGEMENT, MEDICAL EDUCATION & TRAINING                                                                                                                                                                                                                                       |
|                                 |                                                                                                                                                                                                                                                                                                                                                                                                      |

SCHOLARONE™  
Manuscripts

Only

1  
2  
3 **1 Prevalence of Anxiety and Depressive Symptoms among Medical Residents in**  
4 **2 Tunisia: A Cross-Sectional survey**

5  
6  
7 3 Mehdi Marzouk<sup>1</sup> (MD), Lamia Ouanes-Besbes<sup>1</sup> (MD), Islem Ouanes<sup>1</sup> (MD), Zeineb  
8 4 Hammouda<sup>1</sup> (MD), Fahmi Dachraoui<sup>1</sup> (MD), Fekri Abroug<sup>1</sup> (MD)

9  
10 **5 Authors' affiliation :**

11  
12 6 <sup>1</sup> Intensive Care Department, Teaching Hospital, Fatouma Bourguiba and Research  
13 7 Laboratory (LR12SP15), University of Monastir; 5000 Monastir. Tunisia

14  
15 8

16  
17  
18 9 **Funding:** This research received no specific grant from any funding agency in the public,  
19 10 commercial or not-for-profit sectors

20  
21 11 **Competing interest:** none declared

22  
23 12

24  
25 13 **Correspondence:**

26  
27 14 Fekri Abroug

28  
29 15 Intensive Care Department

30  
31 16 CHU F.Bourguiba. Monastir. 5000 Tunisia

32  
33 17 [f.abroug@rns.tn](mailto:f.abroug@rns.tn)

34  
35 18

36  
37 19

38  
39 20

1  
2  
3 21 **Abstract:**

4  
5 22 **Objective:** assess the prevalence of anxiety and depressive symptoms, and associated risk  
6 23 factors in Tunisian residents.

7  
8 24 **Design:** cross-sectional survey

9  
10 25 **Setting:** Faculty of Medicine, Tunis

11  
12 26 **Participants:** all Tunisian residents brought together to choose their next 6-month rotation

13  
14 27 **Intervention:** the items of the Hospital Anxiety and Depression score (HAD) questionnaire  
15 28 was employed to capture the prevalence of anxiety and/or depression among residents.  
16 29 Statistical relationships between anxiety and depression, and socio-demographic and work-  
17 30 related data were explored by Poisson regression.

18  
19 31 **Results:** 1,700 out of 2,200 (77%) medical residents (mean age: 28.5±2 years, female: 60.8%)  
20 32 answered the questionnaire. The mean working hours per week were 62±21 hours; 73%  
21 33 ensured a mean of 5.4±3 night shifts per month; only 8% of them could benefit from a day of  
22 34 safety rest. Overall, 74.1% of participating residents had either, definite (43.6%) or doubtful  
23 35 (30.5%) anxiety, while 62% had definite (30.5%) or doubtful (31.5%) depression symptoms,  
24 36 with 20% having both. Symptoms of anxiety-depression were significantly associated with  
25 37 resident's age (OR= 1.014; 95%CI:1.006-1.023, p= 0.001); female gender (OR= 1.114;95%CI:  
26 38 1.083-1.145, p<0.0001); and the heavy burden of work imposed on a weekly or monthly  
27 39 basis, as reflected by night shift number per month (OR= 1.048;95%CI, 1.016-1.082, p= 0.03),  
28 40 worked hours per week (OR= 1.008;95%CI:1.005-1.011, p<0.0001). Compared to medical  
29 41 specialties, the generally accepted difficult specialties (surgical or medical-surgical) were  
30 42 associated with higher HAD scale (OR= 1.459;95%CI: 1.172-1.816, p= 0.001).

31  
32  
33 43 **Conclusion:** Tunisian residents experience a rate of anxiety/depression substantially higher  
34 44 than that reported at the international level. This phenomenon is worrying as it has been  
35 45 associated with an increase in medical errors, work dissatisfaction and attrition. Means of  
36 46 improving the well-being of Tunisian residents are explored, emphasizing those requiring  
37 47 immediate implementation.

38  
39  
40 48

41  
42  
43 49 **Strengths and limitations of this study:**

44  
45 50 First study to assess the prevalence of Anxiety/Depression among Tunisian residents

46  
47 51 The large participation rate

48  
49 52 The HAD questionnaire is in French (but this language is well mastered by Tunisian residents)

50  
51 53 No information on the rates of mood disorders in the general Tunisian population for  
52 54 comparison

53  
54 55 No assessment of the prevalence of Burnout syndrome

1  
2  
3 56 Physicians are increasingly exposed to stressful situations regardless of age, gender, or  
4 57 seniority in the profession<sup>1-4</sup>. Only a few variables inherent in the personalities, or in work-  
5 58 related strain, are able to modulate the expression of this stress by attenuating or  
6 59 exaggerating the generated mood disorders (anxiety, depression, burn out), and their impact  
7 60 on the personal and professional life<sup>5 6</sup>. These disorders may hamper the physician's  
8 61 professional performance by affecting the concentration at work, and the quality of  
9 62 provided healthcare services, and provoking conflicts with patients or their families, or with  
10 63 colleagues,<sup>7-9</sup>. They are also associated with a higher substance use and abuse, divorce, and  
11 64 even more suicidal ideations<sup>9 10 11</sup>. Medical residents seem at increased risk of developing  
12 65 mental disorders<sup>7 12-14</sup>. A recent systematic review reported a 28.8% pooled prevalence of  
13 66 depression or depressive symptoms in medical residents with a wide variation in this rate,  
14 67 depending on the instrument used<sup>15</sup>. In countries with socio-economic conditions similar to  
15 68 those of Tunisia, the prevalence of depressive symptoms in medical residents ranges from  
16 69 17% in India to 48% in Argentina<sup>16-18</sup>

17  
18  
19  
20  
21  
22  
23  
24  
25  
26  
27  
28 70 Tunisia is a country that is currently experiencing major socio-economic and political  
29 71 changes as a consequence of "Arab spring". Arab spring was a series of anti-government  
30 72 protests, or armed rebellions ignited in Tunisia by the so-called "Jasmine revolution" which  
31 73 spread across North African countries and in the Middle East. It is seen as the translation of  
32 74 peoples' aspirations to democracy, and to replace dictators in place. According to the United  
33 75 nations Development Program (UNDP), the average annual Human Development Index (HDI)  
34 76 has fallen in Tunisia from 0.88% during the decade before the advent of the Arab spring to  
35 77 0.25% during the 5 years that followed leading to a sustained erosion of the middle class, an  
36 78 increase in poverty, and a decrease in overall wealth<sup>19</sup>. The Tunisian downturn has  
37 79 particularly altered the relationship between the main body of the society and the medical  
38 80 profession, the latter being perceived by a large part of the population as a body of  
39 81 privileged, insufficiently empathic, and little concerned by the misfortunes of the population.  
40 82 The assaults against doctors, particularly in public hospitals and their emergency services,  
41 83 malpractice suits and prosecutions, are now very frequent, and are highly publicized on a  
42 84 daily basis on the various media in the country. Moreover, public hospitals experienced just  
43 85 after the revolution a sharp deterioration in the resources and staff made available, together  
44 86 with an alteration of their governance, which paralleled that of the public health sector<sup>20</sup>.

1  
2  
3 87 This situation has greatly frustrated the population, in particular the citizens who cannot  
4 88 afford the private medical sector and its large out-of-pocket costs<sup>21</sup>.

6  
7 89 Among the medical profession, the young Tunisian residents are considered the pillar of  
8  
9 90 these public hospitals. Residents are the only physicians present at the hospital at night, on  
10  
11 91 weekends, and on holidays.

12  
13 92 Residents come to term of a long, demanding, and selective course of studies. The typical  
14  
15 93 resident must have passed his baccalaureate among the first ranked ones, be among the  
16  
17 94 "happy few" who enter the medical school after a tight selection. Indeed, admission to one  
18  
19 95 of the four Faculties of Medicine is reserved to top-ranked graduates both in the  
20  
21 96 baccalaureate and in a specific ranking taking into account the grades of key scientific  
22  
23 97 disciplines. Overall, only 3 to 5% of bachelors are accepted annually to pursue medical  
24  
25 98 studies. After 7 years of medical studies, graduates wishing to specialize, have to successfully  
26  
27 99 undergo a final residency contest usually after 2 to 3 attempts (Annual pass rate = 25%).  
28  
29 100 Aged at least 26, the resident faces the reality of the public hospital, where he is exposed to  
30  
31 101 stress resulting from non-optimal working conditions: the need to meet his professional  
32  
33 102 duties set by his supervisors, and the growing demand of the population.

34  
35 103 We hypothesized that the combination of all of these unfavorable circumstances for  
36  
37 104 professional fulfillment, should result in a high level of mood disorders in medical residents.  
38  
39 105 We conducted a large cross-sectional survey to address the prevalence in Tunisian residents  
40  
41 106 of anxiety and depressive symptoms and highlight associated risk factors.

42  
43  
44  
45  
46  
47  
48  
49  
50  
51  
52  
53  
54  
55  
56  
57  
58  
59  
60 107

1  
2  
3 108 **Patients-Methods**

4  
5 109 **Participants** : In Tunisia, specialization in medicine takes place at the end of general medical  
6  
7 110 studies accomplished in one of the four faculties of medicine in the country. Doctors who  
8  
9 111 wish to specialize do so following a national contest, bringing together the candidates from  
10  
11 112 the four faculties of medicine. This contest is very selective, and takes place over three days.  
12  
13 113 It consists in more than 300 questions (multiple choice, short answer), covering separately  
14  
15 114 each of the following areas: medical specialties, surgical specialties, and basic sciences.  
16  
17 115 More than 1,500 candidates participate annually, for about 500 elected members, who are  
18  
19 116 ranked consecutively in order of merit. The choice of the specialty is then made according to  
20  
21 117 the rank of success in the contest, on a number of posts that is equal to the number of  
22  
23 118 candidates, and distributed among all the medical specialties by quotas which are fixed  
24  
25 119 according to the needs of the country in doctors practicing in medical specialties. The  
26  
27 120 internship periods (of 6 months each) and their distribution between specialties, in order to  
28  
29 121 validate a given specialty, are specified in advance by the college of each specialty. Every six  
30  
31 122 months, all trainee residents in the country (more than 2,000) gather over ten days at the  
32  
33 123 Faculty of Medicine of Tunis, the Tunisian capital, to choose the next 6-month rotation.  
34  
35 124 Within the chosen specialty, the candidate chooses according to seniority first, and his  
36  
37 125 classification in the corresponding level afterwards.

38  
39 126 **Protocol**: The study protocol was approved by the local Institutional Review Board of  
40  
41 127 Fatouma Bourguiba Teaching Hospital, Monastir (reference #2013/108). All the medical  
42  
43 128 residents gathered at the faculty of medicine of Tunis, between December 14 and December  
44  
45 129 22, 2015 for the choice of the next 6 month-rotation, were invited to answer an anonymous,  
46  
47 130 self-administered questionnaire. The questionnaire covers their civil and marital status, the  
48  
49 131 specialty chosen, their level of advancement in the specialty (duration 4 years for medical  
50  
51 132 specialties and 5 years for surgical specialties), and items of the Hospital Anxiety and  
52  
53 133 Depression score (HAD) questionnaire<sup>22</sup>.

54  
55 134 Each residency level includes 300-600 young physicians whose order of passage depends on  
56  
57 135 their ranking. Participants answered the questionnaire immediately after having made their  
58  
59 136 choice.

1  
2  
3 137 **Measurements :** The questionnaire explored three fields: socio-demographic data, work-  
4  
5 138 related characteristics, and HAD score.

6  
7 139 *Socio-demographic* information concerned the gender, age, marital status, number of  
8  
9 140 dependent children if married or divorced.

10  
11 141 *Work-related characteristics* included specialty, the level achieved so far in the specific  
12  
13 142 curriculum of each specialty, the number of shifts per month, whether the shift is followed  
14  
15 143 by a day of safety rest, and total working hours per week. For the statistical analysis purpose,  
16  
17 144 specialties were split into four groups according to the associated workload: medical  
18  
19 145 (example dermatology, pulmonology, rheumatology, psychiatry, fundamental specialties  
20  
21 146 such as histology, physiology etc...); medical and surgical (example: ophthalmology,  
22  
23 147 gynecology-obstetrics, otorhinolaryngology etc...); medical specialties with high workload  
24  
25 148 (example: critical care medicine, emergency medicine, cardiology), and surgical specialties  
26  
27 149 with high workload (neurosurgery, cardiovascular surgery etc).

28  
29 150 *The survey tool* used in our study was Hospital Anxiety and Depression score (HAD) scale that  
30  
31 151 was developed by Zigmond & Snaith<sup>22</sup>. It is a brief questionnaire (containing 14 items), and  
32  
33 152 was originally designed to detect emotional disturbances in non-psychiatric patients treated  
34  
35 153 at hospital clinics. It is a self-report rating scale designed to measure both anxiety and  
36  
37 154 depression. It consists of two subscales, each containing seven items on a 4-point Likert scale  
38  
39 155 (ranging from 0-3). Participants were told that the questions asked relate to their psychic  
40  
41 156 state during the last two weeks. HAD is scored by summing the ratings for the 14 items to  
42  
43 157 yield a total score, and by summing the ratings for the 7 items of each subscale to yield  
44  
45 158 separate scores for anxiety and depression. Two cutoff scores are validated for detecting  
46  
47 159 anxiety and depression, namely 11 for participants who screen positive for  
48  
49 160 anxiety/depression and 8 for probable anxiety/depression.

50  
51 161 The survey was written in French and self-completed by each resident who has agreed to  
52  
53 162 participate in the study. The language of the survey is not actually a barrier to the residents'  
54  
55 163 completion of the survey, because that is the language of all medical studies in the country.  
56  
57 164 The total for depression, anxiety subscales the whole HAD scale were calculated by a  
58  
59 165 resident from our unit.

60  
166 **Statistical analysis :**

1  
2  
3 167 The study design focused on determination of the number of residents who meet the criteria  
4 168 for anxiety and depression. Continuous variables are expressed either as means  $\pm$  Standard  
5 169 Deviations or medians and inter-Quartile Ranges (IQR), according to normal or skewed data  
6  
7  
8 170 distribution. The dichotomous variables are expressed as numbers and percentages.  
9  
10 171 Adjusted Odds Ratios (ORs) and 95% Confidence Intervals (CIs) for each variable were  
11 172 calculated.

12  
13  
14 173 Prevalence of anxiety and depression were calculated and correlated to socio-demographic  
15 174 and work-related characteristics. Chi-square tests were carried out to compare the  
16  
17 175 prevalence of anxiety and depression between groups. Multivariable Poisson regression was  
18  
19 176 used to assess risk factors associated with anxiety and depression cases.

20  
21 177 Statistical significance was denoted by *p*-values less than 0.05. All statistical procedures  
22 178 were performed using IBM SPSS Statistics 21.0 software.

23  
24  
25  
26 179 **Participants and Public involvement:** No participants were involved in setting the research  
27 180 question or in the design or conduct of the study. No participants were asked to advise on  
28  
29 181 interpretation or writing up of results. There are no plans to disseminate the results of the  
30  
31 182 research individually to study participants.

32  
33 183

34  
35  
36 184

37  
38 185

39  
40  
41 186

42  
43 187

44  
45 188

46  
47 189



1  
2  
3 **190 Results:**  
4

5  
6 **191** During the study-period corresponding to December 14<sup>th</sup> to December 22<sup>nd</sup> 2015, 1700 out  
7 **192** of 2200 (77%) medical residents from all levels and different specialties answered the  
8  
9 **193** survey. They had a mean ( $\pm$ SD) age of 28.5 $\pm$ 2 years with a predominance of the female  
10  
11 **194** gender (60.8%); 38.5% were married, of whom 19% had at least one child (Table I).

12  
13 **195** Residents declared they used to work for a mean of 62 $\pm$ 21 hours per week; 73% (1239)  
14  
15 **196** among them ensured night shifts with a mean number of 5.4 $\pm$ 3 per month, of whom only 8%  
16  
17 **197** (98) declared that the shift was systematically followed by a day of safety rest (Table I).

18  
19 **198** The median HAD score amounted to 19 [IQR: 14 ; 23], split on the anxiety subscale (HAD-A) :  
20  
21 **199** 10 [IQR: 7 ; 12], and the depression subscale (HAD-B): 9 [IQR: 6 ; 11].

22  
23 **200** Overall, 742 (43.6%) residents reached the cut-off defining definite anxiety state (ie a score  
24  
25 **201**  $\geq$ 11), and 519 (30.5%) reached the scale level defining definite depression. Out of these  
26  
27 **202** residents, 342 (20%) had both anxiety and depression. In the remaining, the prevalence of  
28  
29 **203** doubtful anxiety score (ie a score  $\geq$ 8) was 30.5%, and that of doubtful depression was 31.5%.  
30  
31 **204** Tables II and III depict the association between demographic and workload characteristics,  
32  
33 **205** and the occurrence of anxiety or depression, respectively.

34  
35 **206** Univariate analysis disclosed age, female gender (66.7% Vs. 56.2%,  $p < 0.0001$ ) and marital  
36  
37 **207** status (42% Vs. 36.7%,  $p = 0.027$ ) as significantly associated with definite cases of anxiety  
38  
39 **208** (HAD-A  $\geq$  11) compared to negative or doubtful ones (HAD-A  $<$  11). The fifth level of  
40  
41 **209** residency course (13.9% vs. 9.7%,  $p = 0.009$ ), and the choice of medical/surgical specialties  
42  
43 **210** (15.9% Vs. 10.8%,  $p = 0.018$ ) were also significantly associated with anxiety. Medical  
44  
45 **211** specialties (45% Vs. 54.2%,  $p < 0.0001$ ) were on the contrary associated with a lower risk of  
46  
47 **212** developing anxiety symptoms (Table II).

48  
49 **213** For definite depressive cases (HAD-D  $\geq$  11) compared to negative and doubtful ones (HAD-D  
50  
51 **214**  $<$  11), age, marital status (45.7% Vs. 36.2%,  $p < 0.0001$ ) were significantly different between  
52  
53 **215** the two groups. Moreover, surgical specialties associated with high-workload (22.9% Vs.  
54  
55 **216** 17.5%,  $p = 0.011$ ) were significantly associated with depressive symptoms in contrast to  
56  
57 **217** medical specialties (44.7 Vs. 52.6%,  $p = 0.003$ ) which were associated with lower depressive  
58  
59 **218** symptoms (Table III).

60  
**219** The number of shifts per month, and working hours per month were associated with both  
**220** anxiety and depressive cases (Table II and III).

1  
2  
3 221 The Poisson regression analysis disclosed the following variables as associated with HAD  
4 222 score: age (OR = 1.014, 95% CI, 1.006-1.023, p = 0.001); female gender (OR = 1.114, 95% CI,  
5 223 1.083-1.145, p <0.0001); night shift number per month (OR = 1.048, 95% CI, 1.016-1.082, p =  
6 224 0.03), working hours per week (OR = 1.008, 95% CI, 1.005-1.011, p = <0.0001) . Compared  
7  
8  
9 225 with medical specialties, medico-surgical ones were independently associated with higher  
10  
11 226 HAD scale (OR = 1.459, 95% CI, 1.172-1.816, p = 0.001; fig 1).

12  
13  
14 227

15 228

16 229

17 230

18 231  
19  
20  
21  
22  
23  
24  
25  
26  
27  
28  
29  
30  
31  
32  
33  
34  
35  
36  
37  
38  
39  
40  
41  
42  
43  
44  
45  
46  
47  
48  
49  
50  
51  
52  
53  
54  
55  
56  
57  
58  
59  
60

For peer review only

## 232 Discussion

233 This large survey encompassing 1700 out of the 2200 Tunisian residents brought  
234 together for the periodic process of choosing internship positions in their specialties, shows  
235 that 43.6% of them had definite criteria of anxiety, and 30.5% had depression. The diagnosis  
236 of anxiety or depression was doubtful in an additional 30% each. Symptoms of anxiety-  
237 depression were significantly associated with age, female sex, and the heavy burden of work  
238 imposed on a weekly or monthly basis as reflected by the high number of weekly working  
239 hours, the night-shift number per month, and the choice of a specialty generally accepted as  
240 a difficult one (surgical or medical-surgical specialty compared to medical specialty).

241 Of interest, this survey unveils a very demanding health system imposed to Tunisian  
242 residents as reflected by the average working hours per week (60 hours), and the number of  
243 night shifts per month (6 on average regardless of the type of specialty), most often without  
244 a day of safety rest.

245 Although, mood disorders and physician distress (such as burnout and depression) are more  
246 prevalent among medical professionals compared to general population, information is  
247 lacking about their prevalence in Tunisia<sup>5 23 24</sup>. This first survey on the subject in our country,  
248 enrolled 77% of potentially concerned residents, yielding a snapshot on the burden incurred  
249 by residents from all specialties in their everyday practice. The use of the French version of  
250 the HAD questionnaire should not be considered as a barrier to the residents' completion of  
251 the survey, because that is the language of all medical studies in the country.

252 International studies stressed the fact that residents usually have higher rates of  
253 depression than the general population<sup>15 25</sup>. Estimates of the prevalence of depression or  
254 depressive symptoms among resident physicians vary from 3% to 60% with a median of  
255 28.8% according to a recent meta-analysis of 54 studies, a proportion that is lower than that  
256 recorded in our study whether we only consider the rate of definite depression, or when we  
257 add the additional cases qualifying for doubtful depression<sup>15</sup>. Of interest, this meta-analysis  
258 emphasized the difference in the methodological approach to address this issue (cross  
259 sectional vs longitudinal studies), and the great variability in the instruments used (no less  
260 than 13 different instruments used in the 54 studies)<sup>15</sup>. A prospective cohort study  
261 conducted in Switzerland and using the HAD inventory used in our study disclosed a  
262 prevalence of 30% anxiety symptoms in the second year residents, and 20% in the fourth

1  
2  
3 263 and sixth year residents; depression symptoms were present in 15% and 10%, respectively<sup>26</sup>.  
4 264 However, benchmarking with countries with socio-economic similarities could be more  
5 265 insightful. In a study including 118 residents from the American University of Beirut, 22%  
6 266 qualified for moderate to major depressive symptoms while only 8% had anxiety<sup>27</sup>.  
7  
8 267 Moreover, in a cross sectional study conducted among residents of various specialties in  
9 268 Saudi Arabia, the prevalence of moderate to severe depressive symptoms was around 20%  
10 269 <sup>17</sup>.

11  
12  
13  
14  
15 270 Resident physicians share the same known causes of depression than the general  
16 271 population: physical health, lifestyle, marital status, history of previous depression,  
17 272 childhood, religiosity etc... They have in addition specific factors according to the way the  
18 273 work is done, its everyday planning, and the constraints inherent to their career  
19 274 development <sup>4</sup>. These risk-factors correspond to the difficulty of their specialty,  
20 275 postgraduate year, stress at work, current rotation difficulty, working hours, shift number  
21 276 etc...<sup>4 15 28</sup>. In our study the Poisson regression model disclosed the following items as  
22 277 statistically associated with the occurrence of anxiety-depression: age, female sex, practice  
23 278 of a specialty generally accepted as very demanding and difficult, and the heavy burden of  
24 279 work imposed on a weekly or monthly basis as reflected by the weekly working hours, and  
25 280 the night-shift number per month. Most of these risk-factors have been reported elsewhere,  
26 281 or are intuitive, but it is their magnitude that makes this study important.

27  
28  
29  
30  
31  
32  
33  
34  
35  
36  
37 282 The occurrence of depression should be considered as a major event in the young  
38 283 physician career or even life. It has been shown that once present, depression as well as  
39 284 burnout may persist throughout the whole residency duration, or even beyond <sup>29 30</sup>. In a  
40 285 nationwide survey involving 3500 Canadian physicians, Sullivan et al reported that 55%  
41 286 found that medicine as a profession impacted negatively on their family and personal life,  
42 287 whereas 65% reported that opportunities to change career despite dissatisfaction were  
43 288 limited <sup>31</sup>. Depression is also a source of decreased concentration at work, an increase in the  
44 289 rate of medical error, work dissatisfaction and conflicts, impaired sleep quality, and a greater  
45 290 propensity to attrition, and even suicide ideation <sup>7 32 33</sup>.

46  
47  
48  
49  
50  
51  
52 291 Considering the high prevalence of anxiety and depression among Tunisian medical  
53 292 residents, every effort aiming at improving the mental health of young physicians should be  
54 293 encouraged. Any strategy should target both the personal level to amend the identified and

1  
2  
3 294 potentially actionable risk-factors, and include more measures targeting the general  
4 295 organization of residents' work modalities, and their relationship with the hierarchy and  
5 296 administration.

6  
7  
8 297 The resident physician should first be aware of the mental problem and seek help in  
9 298 particular those with previous personal history of depression<sup>34</sup>. We did not investigate  
10 299 whether the participating residents sought for, or actually had psychological counseling, but  
11 300 we strongly believe that most did not. More generally, accepted risk factors such as age,  
12 301 gender, marital status, stressors outside work, sleep deprivation, or lifestyle, require more  
13 302 personal attention<sup>4</sup>. The current study was not designed to allow participants' identification  
14 303 so that they could be given individual information and act on it. Future studies targeting  
15 304 preferentially residents (or specialties) at high risk of anxiety, depression, or burnout, should  
16 305 consider such feedback for more specific training programs.

17  
18  
19  
20  
21  
22  
23  
24 306 Residency program factors and the pace of work should also be better managed. While  
25 307 these details were totally non-existent in Tunisia, this has been recently defined through the  
26 308 promulgation on March 9, 2018 of the bylaw regarding the status of Tunisian interns and  
27 309 residents<sup>35</sup>. This promulgation, which has been obtained following long negotiations, and a  
28 310 strike that lasted more than 6 weeks, defines for the first time the role and duty of residents.  
29 311 The maximum number of weekly working hours and that of shift frequency have been  
30 312 clearly defined and have been reduced to a maximum of 40 hours and two per week,  
31 313 respectively. A day of safety rest following every shift has been rendered mandatory.  
32 314 Although still debated, the issue of work-hour restriction could be effective in reducing high  
33 315 emotional exhaustion despite the fact that it carries the risk of alteration in the quality of  
34 316 care and education<sup>36</sup>.

35  
36  
37  
38  
39  
40  
41  
42  
43  
44 317

318 **Table I : Demographic and work characteristics of the study population (n=1700) :**

|                                                  |                                                 |              |
|--------------------------------------------------|-------------------------------------------------|--------------|
| <b>Sex ratio (M/F)</b>                           |                                                 | 667/1033     |
| <b>Age, med [IQR]</b>                            |                                                 | 28 [27 ; 30] |
| <b>Marital Status</b>                            | <b>Single, n(%)</b>                             | 1036 (61)    |
|                                                  | <b>Married, n(%)</b>                            | 655 (38.5)   |
|                                                  | <b>Divorced, n(%)</b>                           | 9 (0.5)      |
| <b>Number of Children</b>                        | <b>Zero, n(%)</b>                               | 343 (20.2)   |
|                                                  | <b>One, n(%)</b>                                | 235 (13.8)   |
|                                                  | <b>More than one, n(%)</b>                      | 86 (5.1)     |
| <b>Residency Level (year)</b>                    | <b>I, n(%)</b>                                  | 320 (18.8)   |
|                                                  | <b>II, n(%)</b>                                 | 410 (24.1)   |
|                                                  | <b>III, n(%)</b>                                | 434 (25.5)   |
|                                                  | <b>IV, n(%)</b>                                 | 340 (20)     |
|                                                  | <b>V, n(%)</b>                                  | 196 (11.5)   |
| <b>Specialty*</b>                                | <b>Medical, n(%)</b>                            | 854 (50.2)   |
|                                                  | <b>Medical and Surgical, n(%)</b>               | 221 (13%)    |
|                                                  | <b>High-workload Medical specialties, n(%)</b>  | 299 (17.6)   |
|                                                  | <b>High-workload Surgical specialties, n(%)</b> | 326 (19.2)   |
| <b>Working hours per week, med [IQR]</b>         |                                                 | 60 [48 ; 76] |
| <b>Night shifts per month, med [IQR]</b>         |                                                 | 6 [4 ; 7]    |
| <b>Recovery day following night shift, n (%)</b> |                                                 | 98 (8)       |

319

320 *\*Specialties were split into four categories according to everyday difficulties: medical*  
 321 *(example dermatology, pulmonology, rheumatology, neurology, psychiatry, fundamental specialties*  
 322 *like histology, physiology etc) ; medical and surgical (example: ophthalmology, gynecology-obstetrics,*  
 323 *otorhinolaryngology etc); high-workload medical (example: critical care medicine, anesthesiology,*  
 324 *emergency medicine, cardiology), and high-workload surgical specialties (surgery, pediatric surgery,*  
 325 *orthopedics, neurosurgery, urology, cardiovascular surgery etc).*

326

327 **Table II** : Demographic and workload characteristics and their association with anxiety :

|                                           | No Anxiety | Definite Anxiety | <i>p</i>      |
|-------------------------------------------|------------|------------------|---------------|
| <b><i>n</i> (%)</b>                       | 958 (56.4) | 742 (43.6)       |               |
| <b>Age, mean±SD</b>                       | 28.5±1.9   | 28.7±2           | <b>0.008</b>  |
| <b>Gender</b>                             |            |                  | <b>0.0001</b> |
| <b>Male</b>                               | 420 (43.8) | 247 (33.3)       |               |
| <b>Female</b>                             | 538 (56.2) | 495 (66.7)       |               |
| <b>Marital Status</b>                     |            |                  | <b>0.027</b>  |
| <b>Single</b>                             | 606 (63.3) | 430 (58)         |               |
| <b>Married</b>                            | 352 (36.7) | 312 (42)         |               |
| <b>Level of Residency</b>                 |            |                  | <b>0.005</b>  |
| <b>I</b>                                  | 188 (19.6) | 132 (17.8)       |               |
| <b>II</b>                                 | 244 (25.5) | 166 (22.4)       |               |
| <b>III</b>                                | 251 (26.2) | 183 (24.7)       |               |
| <b>IV</b>                                 | 182 (19)   | 158 (21.3)       |               |
| <b>V</b>                                  | 93 (9.7)   | 103 (13.9)       |               |
| <b>Specialty</b>                          |            |                  | <b>0.018</b>  |
| <b>Medical</b>                            | 519 (54.2) | 334 (45)         |               |
| <b>Medical and Surgical</b>               | 103 (10.8) | 118 (15.9)       |               |
| <b>High-workload Surgical specialties</b> | 181 (18.9) | 145 (19.5)       |               |
| <b>High-workload Medical specialties</b>  | 155 (16.2) | 145 (19.5)       |               |
| <b>Shifts/month, mean±SD</b>              | 4.9±3      | 6±2.9            | <b>0.0001</b> |
| <b>Working Hours/week, mean±SD</b>        | 58.8±20    | 66.4±20          | <b>0.0001</b> |

328

329

330 **Table III** : Demographic and workload characteristics and association with depression cases

|                                    | No depression | Definite depression | <i>p</i>      |
|------------------------------------|---------------|---------------------|---------------|
| N (%)                              | 1181 (69.5)   | 519 (30.5)          |               |
| Age, mean±SD                       | 28.3±1.8]     | 29±2                | <b>0.007</b>  |
| Gender                             |               |                     | 0.11          |
| Male                               | 453 (38.4)    | 214 (41.2)          |               |
| Female                             | 728 (61.6)    | 305 (58.8)          |               |
| Marital Status                     |               |                     | <b>0.0001</b> |
| Single                             | 754 (63.8)    | 282 (54.3)          |               |
| Married                            | 427 (36.2)    | 237 (45.7)          |               |
| Level of Residency                 |               |                     | <b>0.0001</b> |
| I                                  | 263 (22.3)    | 57 (11)             |               |
| II                                 | 292 (24.7)    | 118 (22.7)          |               |
| III                                | 294 (24.9)    | 140 (27)            |               |
| IV                                 | 218 (18.5)    | 122 (23.5)          |               |
| V                                  | 114 (9.7)     | 82 (15.8)           |               |
| Specialty                          |               |                     | <b>0.006</b>  |
| Medical                            | 621 (52.6)    | 232 (44.7)          |               |
| Medical and Surgical               | 156 (13.2)    | 65 (12.5)           |               |
| High-workload Surgical specialties | 207 (17.5)    | 119 (22.9)          |               |
| High-workload Medical specialties  | 197 (16.7)    | 103 (19.8)          |               |
| Shifts/month, mean±SD]             | 5±3           | 6±2.9               | <b>0.0001</b> |
| Working Hours/week, med [IQR]      | 60±20         | 66±20               | <b>0.0001</b> |

331

332



1  
2  
3 333  
4

5 334 **Legend Figure1:** Risk Factors associated with Total HAD Score  
6

7 335 **Authors' contributions**  
8

9 336 Study Concept and design: MM and FA; Data Acquisition: MM; Analysis and interpretation of  
10 337 the data: MM, LOB, ZH, IO, FD, FA; All authors read and approved the final manuscript. MM  
11 338 and FA had full access to the data and take responsibility for its integrity and the accuracy of  
12 339 the analyses.  
13  
14

15 340 **Acknowledgements:** The authors are indebted to Ms Vaughn Khelifa and Pr Mahmoud Bchir  
16 341 for the Language editing of the manuscript  
17  
18

19 342 **Data Sharing statement:** dataset is available by contacting FA at f.abroug@rns.tn  
20

21 343  
22 344  
23  
24  
25  
26  
27  
28  
29  
30  
31  
32  
33  
34  
35  
36  
37  
38  
39  
40  
41  
42  
43  
44  
45  
46  
47  
48  
49  
50  
51  
52  
53  
54  
55  
56  
57  
58  
59  
60

345 **References**

- 346 1. Shanafelt TD, Sloan JA, Habermann TM. The well-being of physicians. *Am J*  
347 *Med* 2003;**114**(6):513-9.
- 348 2. Hsu K, Marshall V. Prevalence of depression and distress in a large sample of  
349 Canadian residents, interns, and fellows. *Am J Psychiatry*  
350 1987;**144**(12):1561-6.
- 351 3. Rotenstein LS, Ramos MA, Torre M, et al. Prevalence of Depression,  
352 Depressive Symptoms, and Suicidal Ideation Among Medical Students: A  
353 Systematic Review and Meta-Analysis. *JAMA* 2016;**316**(21):2214-36.
- 354 4. Joules N, Williams, D. and Thompson, A. Depression in Resident Physicians: A  
355 Systematic Review. . *Open Journal of Depression* 2014;**3**:898-100.
- 356 5. Sen S, Kranzler HR, Krystal JH, et al. A prospective cohort study investigating  
357 factors associated with depression during medical internship. *Arch Gen*  
358 *Psychiatry* 2010;**67**(6):557-65.
- 359 6. Rama-Maceiras P, Jokinen J, Kranke P. Stress and burnout in anaesthesia: a  
360 real world problem? *Curr Opin Anaesthesiol* 2015;**28**(2):151-8.
- 361 7. Fahrenkopf AM, Sectish TC, Barger LK, et al. Rates of medication errors  
362 among depressed and burnt out residents: prospective cohort study.  
363 *BMJ* 2008;**336**(7642):488-91.
- 364 8. Tsai YC, Liu CH. Factors and symptoms associated with work stress and  
365 health-promoting lifestyles among hospital staff: a pilot study in Taiwan.  
366 *BMC health services research* 2012;**12**:199.
- 367 9. de Oliveira GS, Jr., Chang R, Fitzgerald PC, et al. The prevalence of burnout  
368 and depression and their association with adherence to safety and  
369 practice standards: a survey of United States anesthesiology trainees.  
370 *Anesth Analg* 2013;**117**(1):182-93.
- 371 10. Lebensohn P, Dodds S, Benn R, et al. Resident wellness behaviors:  
372 relationship to stress, depression, and burnout. *Family medicine*  
373 2013;**45**(8):541-9.
- 374 11. van der Heijden F, Dillingh G, Bakker A, et al. Suicidal thoughts among  
375 medical residents with burnout. *Archives of suicide research : official*  
376 *journal of the International Academy for Suicide Research*  
377 2008;**12**(4):344-6.
- 378 12. Amaddeo F, Jones J. What is the impact of socio-economic inequalities on  
379 the use of mental health services? *Epidemiologia e psichiatria sociale*  
380 2007;**16**(1):16-9.
- 381 13. Donisi V, Tedeschi F, Percudani M, et al. Prediction of community mental  
382 health service utilization by individual and ecological level socio-  
383 economic factors. *Psychiatry research* 2013;**209**(3):691-8.

- 1  
2  
3 384 14. Ripp J, Babyatsky M, Fallar R, et al. The incidence and predictors of job  
4 385 burnout in first-year internal medicine residents: a five-institution study.  
5 386 Academic medicine : journal of the Association of American Medical  
6 387 Colleges 2011;**86**(10):1304-10.
- 8 388 15. Mata DA, Ramos MA, Bansal N, et al. Prevalence of Depression and  
9 389 Depressive Symptoms Among Resident Physicians: A Systematic Review  
10 390 and Meta-analysis. JAMA 2015;**314**(22):2373-83.
- 12 391 16. Waldman SV, Diez JC, Arazi HC, et al. Burnout, perceived stress, and  
13 392 depression among cardiology residents in Argentina. Acad Psychiatry  
14 393 2009;**33**(4):296-301.
- 16 394 17. Al-Maddah EM, Al-Dabal BK, Khalil MS. Prevalence of Sleep Deprivation and  
17 395 Relation with Depressive Symptoms among Medical Residents in King  
18 396 Fahd University Hospital, Saudi Arabia. Sultan Qaboos University medical  
19 397 journal 2015;**15**(1):e78-84.
- 21 398 18. Shashikantha S K SMP. Prevalence of depression among post graduate  
22 399 residents in a tertiary health care institute, Haryana. International  
23 400 Journal of Medical Science and Public Health 2016;**5**(10):2139-42.
- 25 401 19. program UnD. 2016 HDR Report 2016 [Available from:  
26 402 <http://hdr.undp.org/en/composite/trends>.  
27 403
- 28 404 20. Chaabouni.S AC. The governance structure and regulation in Tunisian public  
29 405 hospitals. International Journal of Social and Behavioural Sciences  
30 406 2013;**1**(8):162-67.
- 32 407 21. Out-of-pocket health expenditure (% of private expenditure on health) In:  
33 408 database WHOGHE, ed.: World Health Organization Global Health  
34 409 Expenditure database, 2018.
- 36 410 22. Zigmond AS, Snaith RP. The hospital anxiety and depression scale. Acta  
37 411 psychiatrica Scandinavica 1983;**67**(6):361-70.
- 39 412 23. Kessler RC, Berglund P, Demler O, et al. Lifetime prevalence and age-of-  
40 413 onset distributions of DSM-IV disorders in the National Comorbidity  
41 414 Survey Replication. Archives of general psychiatry 2005;**62**(6):593-602.
- 43 415 24. Dyrbye LN, Thomas MR, Shanafelt TD. Systematic review of depression,  
44 416 anxiety, and other indicators of psychological distress among U.S. and  
45 417 Canadian medical students. Academic medicine : journal of the  
46 418 Association of American Medical Colleges 2006;**81**(4):354-73.
- 48 419 25. Schneider SE, Phillips WM. Depression and anxiety in medical, surgical, and  
49 420 pediatric interns. Psychol Rep 1993;**72**(3 Pt 2):1145-6.
- 51 421 26. Buddeberg-Fischer B, Stamm M, Buddeberg C, et al. [Anxiety and  
52 422 depression in residents - results of a Swiss longitudinal study]. Z  
53 423 Psychosom Med Psychother 2009;**55**(1):37-50.

- 1  
2  
3 423 27. Talih F, Warakian R, Ajaltouni J, et al. Correlates of Depression and Burnout  
4 424 Among Residents in a Lebanese Academic Medical Center: a Cross-  
5 425 Sectional Study. *Acad Psychiatry* 2016;**40**(1):38-45.  
6  
7 426 28. Kirsling RA, Kochar MS, Chan CH. An evaluation of mood states among first-  
8 427 year residents. *Psychol Rep* 1989;**65**(2):355-66.  
9  
10 428 29. Girard DE, Hickam DH, Gordon GH, et al. A prospective study of internal  
11 429 medicine residents' emotions and attitudes throughout their training.  
12 430 *Acad Med* 1991;**66**(2):111-4.  
13  
14 431 30. Roh MS, Jeon HJ, Kim H, et al. The prevalence and impact of depression  
15 432 among medical students: a nationwide cross-sectional study in South  
16 433 Korea. *Acad Med* 2010;**85**(8):1384-90.  
17  
18 434 31. Sullivan P, Buske L. Results from CMAA's huge 1998 physician survey point to  
19 435 a dispirited profession. *CMAJ* 1998;**159**(5):525-8.  
20  
21 436 32. Khoushhal Z, Hussain MA, Greco E, et al. Prevalence and Causes of Attrition  
22 437 Among Surgical Residents: A Systematic Review and Meta-analysis. *JAMA*  
23 438 *Surg* 2017;**152**(3):265-72.  
24  
25 439 33. West CP, Huschka MM, Novotny PJ, et al. Association of perceived medical  
26 440 errors with resident distress and empathy: a prospective longitudinal  
27 441 study. *JAMA* 2006;**296**(9):1071-8.  
28  
29 442 34. Goebert D, Thompson D, Takeshita J, et al. Depressive symptoms in medical  
30 443 students and residents: a multischool study. *Acad Med* 2009;**84**(2):236-  
31 444 41.  
32  
33 445 35. Health TMO. Bylaw of Medical Interns and Residents: Journal Officiel de la  
34 446 République Tunisienne; 2018 [Journal Officiel de La République  
35 447 Tunisienne:[Available from:  
36 448 [http://www.legislation.tn/fr/recherche/jort/date\\_jort\\_deb/09-03-2018](http://www.legislation.tn/fr/recherche/jort/date_jort_deb/09-03-2018).  
37  
38 449 36. Gopal R, Glasheen JJ, Miyoshi TJ, et al. Burnout and internal medicine  
39 450 resident work-hour restrictions. *Arch Intern Med* 2005;**165**(22):2595-  
40 451 600.  
41  
42 452  
43  
44  
45  
46  
47  
48  
49  
50  
51  
52  
53  
54  
55  
56  
57  
58  
59  
60

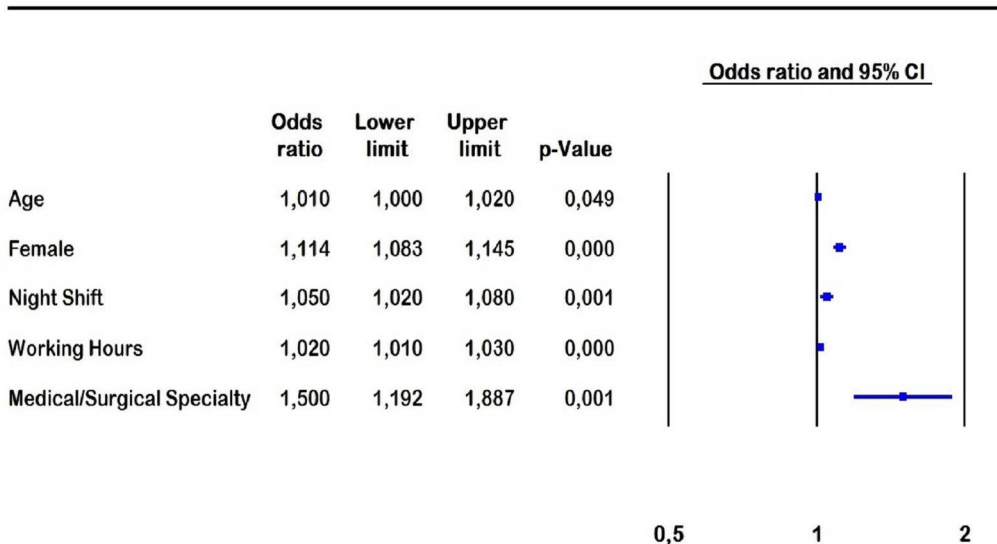

Risk factors for Anxiety/depression

541x304mm (96 x 96 DPI)

Review only

STROBE Statement—Checklist of items that should be included in reports of *cross-sectional studies*

|                              | Item No | Recommendation                                                                                                                                                                                               |         |
|------------------------------|---------|--------------------------------------------------------------------------------------------------------------------------------------------------------------------------------------------------------------|---------|
| <b>Title and abstract</b>    | 1       | (a) Indicate the study's design with a commonly used term in the title or the abstract                                                                                                                       | X       |
|                              |         | (b) Provide in the abstract an informative and balanced summary of what was done and what was found                                                                                                          | X       |
| <b>Introduction</b>          |         |                                                                                                                                                                                                              |         |
| Background/rationale         | 2       | Explain the scientific background and rationale for the investigation being reported                                                                                                                         | P2      |
| Objectives                   | 3       | State specific objectives, including any prespecified hypotheses                                                                                                                                             | P2      |
| <b>Methods</b>               |         |                                                                                                                                                                                                              |         |
| Study design                 | 4       | Present key elements of study design early in the paper                                                                                                                                                      | P5      |
| Setting                      | 5       | Describe the setting, locations, and relevant dates, including periods of recruitment, exposure, follow-up, and data collection                                                                              | P5      |
| Participants                 | 6       | (a) Give the eligibility criteria, and the sources and methods of selection of participants                                                                                                                  | P5      |
| Variables                    | 7       | Clearly define all outcomes, exposures, predictors, potential confounders, and effect modifiers. Give diagnostic criteria, if applicable                                                                     | P6      |
| Data sources/<br>measurement | 8*      | For each variable of interest, give sources of data and details of methods of assessment (measurement). Describe comparability of assessment methods if there is more than one group                         | P6      |
| Bias                         | 9       | Describe any efforts to address potential sources of bias                                                                                                                                                    | P6      |
| Study size                   | 10      | Explain how the study size was arrived at                                                                                                                                                                    | P7      |
| Quantitative variables       | 11      | Explain how quantitative variables were handled in the analyses. If applicable, describe which groupings were chosen and why                                                                                 | P7      |
| Statistical methods          | 12      | (a) Describe all statistical methods, including those used to control for confounding                                                                                                                        | P7      |
|                              |         | (b) Describe any methods used to examine subgroups and interactions                                                                                                                                          | NA      |
|                              |         | (c) Explain how missing data were addressed                                                                                                                                                                  | P7      |
|                              |         | (d) If applicable, describe analytical methods taking account of sampling strategy                                                                                                                           | NA      |
|                              |         | (e) Describe any sensitivity analyses                                                                                                                                                                        | P7      |
| <b>Results</b>               |         |                                                                                                                                                                                                              |         |
| Participants                 | 13*     | (a) Report numbers of individuals at each stage of study—eg numbers potentially eligible, examined for eligibility, confirmed eligible, included in the study, completing follow-up, and analysed            | P8      |
|                              |         | (b) Give reasons for non-participation at each stage                                                                                                                                                         | P8      |
|                              |         | (c) Consider use of a flow diagram                                                                                                                                                                           | NA      |
| Descriptive data             | 14*     | (a) Give characteristics of study participants (eg demographic, clinical, social) and information on exposures and potential confounders                                                                     | Table I |
|                              |         | (b) Indicate number of participants with missing data for each variable of interest                                                                                                                          | NA      |
| Outcome data                 | 15*     | Report numbers of outcome events or summary measures                                                                                                                                                         | P8      |
| Main results                 | 16      | (a) Give unadjusted estimates and, if applicable, confounder-adjusted estimates and their precision (eg, 95% confidence interval). Make clear which confounders were adjusted for and why they were included | P8      |

|                          |    |                                                                                                                                                                            |        |
|--------------------------|----|----------------------------------------------------------------------------------------------------------------------------------------------------------------------------|--------|
|                          |    | (b) Report category boundaries when continuous variables were categorized                                                                                                  | P8     |
|                          |    | (c) If relevant, consider translating estimates of relative risk into absolute risk for a meaningful time period                                                           | NA     |
| Other analyses           | 17 | Report other analyses done—eg analyses of subgroups and interactions, and sensitivity analyses                                                                             | P9     |
| <b>Discussion</b>        |    |                                                                                                                                                                            |        |
| Key results              | 18 | Summarise key results with reference to study objectives                                                                                                                   | P10    |
| Limitations              | 19 | Discuss limitations of the study, taking into account sources of potential bias or imprecision. Discuss both direction and magnitude of any potential bias                 | P10    |
| Interpretation           | 20 | Give a cautious overall interpretation of results considering objectives, limitations, multiplicity of analyses, results from similar studies, and other relevant evidence | P10-11 |
| Generalisability         | 21 | Discuss the generalisability (external validity) of the study results                                                                                                      | P11    |
| <b>Other information</b> |    |                                                                                                                                                                            |        |
| Funding                  | 22 | Give the source of funding and the role of the funders for the present study and, if applicable, for the original study on which the present article is based              | P1     |

\*Give information separately for exposed and unexposed groups.

**Note:** An Explanation and Elaboration article discusses each checklist item and gives methodological background and published examples of transparent reporting. The STROBE checklist is best used in conjunction with this article (freely available on the Web sites of PLoS Medicine at <http://www.plosmedicine.org/>, Annals of Internal Medicine at <http://www.annals.org/>, and Epidemiology at <http://www.epidem.com/>). Information on the STROBE Initiative is available at [www.strobe-statement.org](http://www.strobe-statement.org).

# BMJ Open

## Prevalence of Anxiety and Depressive Symptoms among Medical Residents in Tunisia: A Cross-Sectional survey

|                                 |                                                                                                                                                                                                                                                                                                                                                                                                      |
|---------------------------------|------------------------------------------------------------------------------------------------------------------------------------------------------------------------------------------------------------------------------------------------------------------------------------------------------------------------------------------------------------------------------------------------------|
| Journal:                        | <i>BMJ Open</i>                                                                                                                                                                                                                                                                                                                                                                                      |
| Manuscript ID                   | bmjopen-2017-020655.R2                                                                                                                                                                                                                                                                                                                                                                               |
| Article Type:                   | Research                                                                                                                                                                                                                                                                                                                                                                                             |
| Date Submitted by the Author:   | 21-May-2018                                                                                                                                                                                                                                                                                                                                                                                          |
| Complete List of Authors:       | Marzouk, Mehdi; CHU F.Bourguiba, Intensive Care; Centre Hospitalier de Bethune, Nord pas-de-calais<br>Ouanes-Besbes, Lamia; CHU F.Bourguiba Monastir, Intensive Care Med<br>Ouanes, Islem; CHU Fattouma Bourguiba, ICU<br>Hammouda, Zeineb; CHU F.Bourguiba , Intensive Care<br>Dachraoui, Fahmi; CHU F.Bourguiba, Intensive Care Department<br>Abroug, Fekri; CHU Fatouma Bourguiba, Intensive Care |
| <b>Primary Subject Heading</b>: | Medical education and training                                                                                                                                                                                                                                                                                                                                                                       |
| Secondary Subject Heading:      | Mental health                                                                                                                                                                                                                                                                                                                                                                                        |
| Keywords:                       | EDUCATION & TRAINING (see Medical Education & Training), Human resource management < HEALTH SERVICES ADMINISTRATION & MANAGEMENT, MEDICAL EDUCATION & TRAINING                                                                                                                                                                                                                                       |
|                                 |                                                                                                                                                                                                                                                                                                                                                                                                      |

SCHOLARONE™  
Manuscripts

Only



1  
2  
3 **1 Prevalence of Anxiety and Depressive Symptoms among Medical Residents in**  
4 **2 Tunisia: A Cross-Sectional survey**  
5

6 3 Mehdi Marzouk<sup>1</sup> (MD), Lamia Ouanes-Besbes<sup>1</sup> (MD), Islem Ouanes<sup>1</sup> (MD), Zeineb  
7 4 Hammouda<sup>1</sup> (MD), Fahmi Dachraoui<sup>1</sup> (MD), Fekri Abroug<sup>1</sup> (MD)  
8  
9

10 **5 Authors' affiliation :**  
11

12 6 <sup>1</sup> Intensive Care Department, Teaching Hospital, Fatouma Bourguiba and Research  
13 7 Laboratory (LR12SP15), University of Monastir; 5000 Monastir. Tunisia  
14  
15

16 8

17 9 **Funding:** This research received no specific grant from any funding agency in the public,  
18 10 commercial or not-for-profit sectors  
19  
20

21 11 **Competing interest:** none declared  
22  
23

24 12

25 13 **Correspondence:**  
26

27 14 Fekri Abroug  
28

29 15 Intensive Care Department  
30

31 16 CHU F.Bourguiba. Monastir. 5000 Tunisia  
32

33 17 f.abroug@rns.tn  
34  
35

36 18

37 19

38 20  
39  
40  
41  
42  
43  
44  
45  
46  
47  
48  
49  
50  
51  
52  
53  
54  
55  
56  
57  
58  
59  
60

1  
2  
3 21 **Abstract:**

4  
5 22 **Objective:** assess the prevalence of anxiety and depressive symptoms, and associated risk  
6 23 factors in Tunisian medical residents.

7  
8 24 **Design:** cross-sectional survey

9  
10 25 **Setting:** Faculty of Medicine, Tunis

11  
12 26 **Participants:** all Tunisian medical residents brought together between December 14 and 22,  
13 27 2015, to choose their next 6-month rotation

14  
15 28 **Intervention:** the items of the Hospital Anxiety and Depression score (HAD) questionnaire  
16 29 was employed to capture the prevalence of anxiety and/or depression among residents.  
17 30 Statistical relationships between anxiety and depression (HAD score), and socio-  
18 31 demographic and work-related data were explored by Poisson regression.

19  
20 32 **Results:** 1,700 out of 2,200 (77%) medical residents (mean age: 28.5±2 years, female: 60.8%)  
21 33 answered the questionnaire. The mean working hours per week were 62±21 hours; 73%  
22 34 ensured a mean of 5.4±3 night shifts per month; only 8% of them could benefit from a day of  
23 35 safety rest. Overall, 74.1% of participating residents had either, definite (43.6%) or probable  
24 36 (30.5%) anxiety, while 62% had definite (30.5%) or probable (31.5%) depression symptoms,  
25 37 with 20% having both definite anxiety and definite depression. Total HAD score was  
26 38 significantly associated with resident's age (OR=1.014; 95%CI:1.006-1.023, p=0.001); female  
27 39 gender (OR=1.114;95%CI: 1.083-1.145, p<0.0001); and the heavy burden of work imposed  
28 40 on a weekly or monthly basis, as reflected by night shift number per month  
29 41 (OR=1.048;95%CI, 1.016-1.082, p=0.03), worked hours per week (OR=1.008;95%CI:1.005-  
30 42 1.011, p<0.0001). Compared to medical specialties, the generally accepted difficult  
31 43 specialties (surgical or medical-surgical) were associated with a higher HAD score  
32 44 (OR=1.459;95%CI: 1.172-1.816, p=0.001).

33  
34 45 **Conclusion:** Tunisian residents experience a rate of anxiety/depression substantially higher  
35 46 than that reported at the international level. This phenomenon is worrying as it has been  
36 47 associated with an increase in medical errors, work dissatisfaction and attrition. Means of  
37 48 improving the well-being of Tunisian medical residents are explored, emphasizing those  
38 49 requiring immediate implementation.

39  
40  
41  
42 50

43  
44  
45 51 **Strengths and limitations of this study:**

46  
47 52 First study to assess the prevalence of Anxiety/Depression among Tunisian residents

48  
49 53 The large participation rate

50  
51 54 The HAD questionnaire is in French (but this language is well mastered by Tunisian residents)

52  
53 55 No information on the rates of mood disorders in the general Tunisian population for  
54 56 comparison

55  
56 57 No assessment of the prevalence of Burnout syndrome

1  
2  
3 58 Physicians are increasingly exposed to stressful situations regardless of age, gender,  
4 59 or seniority in the profession<sup>1-4</sup>. Only a few variables inherent in the personalities, or in  
5 60 work-related strain, are able to modulate the expression of this stress by attenuating or  
6 61 exaggerating the generated mood disorders (anxiety, depression, burnout), and their impact  
7 62 on the personal and professional life<sup>5 6</sup>. Medical residents seem at increased risk of  
8 63 developing mental disorders<sup>7-10</sup>. These disorders may hamper the physician's professional  
9 64 performance by affecting their concentration at work, and the quality of provided healthcare  
10 65 services, and provoking conflicts with patients or their families, or with colleagues,<sup>9 11 12</sup>.  
11 66 These mental health issues are also associated with a higher substance use and abuse,  
12 67 divorce, and even more suicidal ideations<sup>12 13 14</sup>. A recent systematic review reported a  
13 68 28.8% pooled prevalence of depression or depressive symptoms in medical residents with a  
14 69 wide variation in this rate, depending on the instrument used<sup>15</sup>. In countries with socio-  
15 70 economic conditions similar to those of Tunisia, the prevalence of depressive symptoms in  
16 71 medical residents ranges from 17% in India to 48% in Argentina<sup>16-18</sup>

17  
18  
19  
20  
21  
22  
23  
24  
25  
26  
27  
28 72 Tunisia is a country that is currently experiencing major socio-economic and political  
29 73 changes as a consequence of "Arab spring". Arab spring was a series of anti-government  
30 74 protests, or armed rebellions ignited in Tunisia by the so-called "Jasmine revolution" which  
31 75 spread across North African countries and in the Middle East. It is seen as the translation of  
32 76 peoples' aspirations to democracy, and to replace dictators in place. According to the United  
33 77 nations Development Program (UNDP), the average annual Human Development Index (HDI)  
34 78 has fallen in Tunisia from 0.88%, during the decade before the advent of the Arab spring, to  
35 79 0.25% during the 5 years that followed. This led to a sustained erosion of the middle class,  
36 80 an increase in poverty, and a decrease in overall wealth<sup>19</sup>. The Tunisian downturn has  
37 81 particularly altered the relationship between the main body of the society and the medical  
38 82 profession, the latter being perceived by a large part of the population as a body of  
39 83 privileged, insufficiently empathic, with little concern for the misfortunes of the population.  
40 84 Assaults against doctors, particularly in public hospitals and their emergency services,  
41 85 malpractice suits and prosecutions, are now very frequent, and are highly publicized on a  
42 86 daily basis by the various media in the country. Just after the revolution, public hospitals  
43 87 experienced a sharp deterioration in the resources and staff made available, together with  
44 88 an alteration in their governance<sup>20</sup>. This situation has greatly frustrated the population, in

1  
2  
3 89 particular the citizens who cannot afford the private medical sector and its large out-of-  
4 90 pocket costs<sup>21</sup>.

6  
7 91 Residents come to term of a long, demanding, and selective course of studies. The typical  
8  
9 92 resident must have passed his baccalaureate among the first ranked ones, be among the  
10  
11 93 "happy few" (3-5% top-ranked graduates) who enter to one of the four Tunisian medical  
12  
13 94 schools. After 7 years of medical studies, graduates wishing to specialize, have to  
14  
15 95 successfully undergo a final residency contest. Success usually takes 2 to 3 attempts (annual  
16  
17 96 pass rate = 25%). Aged at least 26, the medical resident faces the reality of the public  
18  
19 97 hospital where residents are the only physicians present in the hospital at night, on  
20  
21 98 weekends, and on holidays. They are also exposed to stress resulting from non-optimal  
22  
23 99 working conditions: the need to meet professional duties set by supervisors, and the  
24  
25 100 growing demand of the population.

26  
27 101 We hypothesized that the combination of all of these unfavorable circumstances for  
28  
29 102 professional fulfillment, should result in a high level of mood disorders in medical residents.  
30  
31 103 We conducted a large cross-sectional survey to address the prevalence of anxiety and  
32  
33 104 depressive symptoms and associated risk factors in Tunisian medical residents.

34  
35  
36  
37  
38  
39  
40  
41  
42  
43  
44  
45  
46  
47  
48  
49  
50  
51  
52  
53  
54  
55  
56  
57  
58  
59  
60

105

1  
2  
3 106 **Patients-Methods**

4  
5 107 **Participants** : In Tunisia, specialization in medicine takes place at the end of general medical  
6  
7 108 studies. Doctors who wish to specialize do so following a national contest, bringing together  
8  
9 109 the candidates from the four faculties of medicine. This contest is very selective, and takes  
10  
11 110 place over three days. It consists of more than 300 questions (multiple choice, short answer),  
12  
13 111 covering separately each of the following areas: medical specialties, surgical specialties, and  
14  
15 112 basic sciences.

16  
17 113 More than 1,500 candidates participate annually, for about 500 elected members, who are  
18  
19 114 ranked consecutively in order of merit. The choice of the specialty is then made according to  
20  
21 115 the rank of success in the contest, on a number of places that is equal to the number of  
22  
23 116 candidates. Distribution on all the medical specialties is done by quotas which are set  
24  
25 117 according to the needs of the country in doctors practicing in medical specialties. The  
26  
27 118 internship periods (of 6 months each) and their distribution between specialties, in order to  
28  
29 119 validate a given specialty, are specified in advance by the college of each specialty. Every six  
30  
31 120 months, all trainee residents in the country (more than 2,000) gather over ten days at the  
32  
33 121 Faculty of Medicine of Tunis, the Tunisian capital, to choose the next 6-month rotation.  
34  
35 122 Within the chosen specialty, the candidate chooses according to seniority first (300-600 in  
36  
37 123 each residency level), and then classification in the corresponding level afterwards.

38  
39 124 **Protocol**: The study protocol was approved by the local Institutional Review Board of  
40  
41 125 Fatouma Bourguiba Teaching Hospital, Monastir (reference #2013/108). All the medical  
42  
43 126 residents gathered at the faculty of medicine of Tunis, between December 14 and December  
44  
45 127 22, 2015 for the choice of the next 6 month-rotation, and were invited to answer an  
46  
47 128 anonymous, self-administered questionnaire, immediately after having made their choice.  
48  
49 129 The questionnaire covers their civil and marital status, the specialty chosen, their level of  
50  
51 130 advancement in the specialty (duration 4 years for medical specialties and 5 years for  
52  
53 131 surgical specialties), and items of the Hospital Anxiety and Depression score (HAD)  
54  
55 132 questionnaire<sup>22</sup>.

56  
57 133 **Measurements** : The questionnaire explored three fields: socio-demographic data, work-  
58  
59 134 related characteristics, and HAD score.  
60

1  
2  
3 135 *Socio-demographic* information concerned the gender, age, marital status, number of  
4  
5 136 dependent children if married or divorced.

6  
7 137 *Work-related characteristics* included specialty, the level achieved so far in the specific  
8  
9 138 curriculum of each specialty, the number of shifts per month, whether the shift was followed  
10  
11 139 by a day of safety rest, and total working hours per week. For the statistical analysis purpose,  
12  
13 140 specialties were split into four groups according to the associated workload: medical  
14  
15 141 (example dermatology, pulmonology, rheumatology, psychiatry, fundamental specialties  
16  
17 142 such as histology, physiology etc...); medical and surgical (example: ophthalmology,  
18  
19 143 gynecology-obstetrics, otorhinolaryngology etc...); medical specialties with high workload  
20  
21 144 (example: critical care medicine, emergency medicine, cardiology), and surgical specialties  
22  
23 145 with high workload (neurosurgery, cardiovascular surgery etc).

24  
25 146 *The survey tool* used in our study was Hospital Anxiety and Depression score (HAD) scale that  
26  
27 147 was developed by Zigmond & Snaith<sup>22</sup>. It is a brief questionnaire (containing 14 items), and  
28  
29 148 was originally designed to detect emotional disturbances in non-psychiatric patients treated  
30  
31 149 at hospital clinics. It is a self-report rating scale designed to measure both anxiety and  
32  
33 150 depression. It consists of two subscales, each containing seven items on a 4-point Likert scale  
34  
35 151 (ranging from 0-3). Participants were told that the questions asked related to their mental  
36  
37 152 state during the last two weeks. HAD is scored by summing the ratings for the 14 items to  
38  
39 153 yield a total score, and by summing the ratings for the 7 items of each subscale to yield  
40  
41 154 separate scores for anxiety and depression. Two cutoff scores are validated for detecting  
42  
43 155 anxiety and depression, namely 11 for participants who screen positive for  
44  
45 156 anxiety/depression and 8 for probable anxiety/depression.

46  
47 157 The survey was written in French and self-completed by each resident who has agreed to  
48  
49 158 participate in the study. The language of the survey is not actually a barrier to the residents'  
50  
51 159 completion of the survey, because that is the language of all medical studies in the country.  
52  
53 160 The total for depression, anxiety subscales the whole HAD scale were calculated by a  
54  
55 161 resident from our unit.

56  
57 162

58  
59 163 **Statistical analysis :**

60  
61 164 The study design focused on determination of the number of residents who met the criteria  
62  
63 165 for anxiety and depression. Continuous variables were expressed either as means  $\pm$  Standard

1  
2  
3 166 Deviations or medians and inter-Quartile Ranges (IQR), according to normal or skewed data  
4 167 distribution. The dichotomous variables were expressed as numbers and percentages.  
5  
6 168 Adjusted Odds Ratios (ORs) and 95% Confidence Intervals (CIs) for each variable were  
7  
8 169 calculated.

9  
10 170 Prevalence of anxiety and depression were calculated and correlated to socio-demographic  
11 171 and work-related characteristics. Chi-square tests were carried out to compare the  
12 172 prevalence of anxiety and depression between groups. We used multivariable Poisson  
13 173 regression to identify explanatory variables with a statistically significant effect on the total HAD  
14 174 score.

15  
16  
17 175 Statistical significance was denoted by *p*-values less than 0.05. All statistical procedures  
18 176 were performed using IBM SPSS Statistics 21.0 software.

19  
20  
21 177 **Participants and Public involvement:** No participants were involved in setting the research  
22 178 question or in the design or conduct of the study. No participants were asked to advise on  
23 179 interpretation or writing up of results. There are no plans to disseminate the results of the  
24 180 research individually to study participants.

25  
26  
27 181

28  
29  
30 182

31  
32  
33 183

34  
35  
36 184

37  
38  
39 185

40  
41  
42 186

43  
44  
45 187

1  
2  
3 **188 Results:**  
4

5  
6 **189** During the study-period corresponding to December 14<sup>th</sup> to December 22<sup>nd</sup> 2015, 1700 out  
7  
8 **190** of 2200 (77%) medical residents from all levels and different specialties answered the  
9  
10 **191** survey. They had a mean ( $\pm$ SD) age of 28.5 $\pm$ 2 years with a predominance of the female  
11  
12 **192** gender (60.8%); 38.5% were married, of whom 19% had at least one child (Table I).

13  
14 **193** Residents declared they worked for a mean of 62 $\pm$ 21 hours per week; 73% (1239) among  
15  
16 **194** them worked night shifts with a mean number of 5.4 $\pm$ 3 per month, of whom only 8% (98)  
17  
18 **195** declared that the shift was systematically followed by a day of safety rest (Table I).

19  
20 **196** The median HAD score amounted to 19 [IQR: 14 ; 23], split on the anxiety subscale (HAD-A) :  
21  
22 **197** 10 [IQR: 7 ; 12], and the depression subscale (HAD-B): 9 [IQR: 6 ; 11].

23  
24 **198** Overall, 742 (43.6%) residents reached the cut-off defining definite anxiety state (ie a score  
25  
26 **199**  $\geq$ 11), and 519 (30.5%) reached the scale level defining definite depression. Out of these  
27  
28 **200** residents, 342 (20%) had both anxiety and depression. In the remaining, the prevalence of  
29  
30 **201** probable anxiety score (ie a score  $\geq$ 8) was 30.5%, and that of probable depression was  
31  
32 **202** 31.5%. Tables II and III depict the association between demographic and workload  
33  
34 **203** characteristics, and the occurrence of anxiety or depression, respectively.

35  
36 **204** In univariate analysis, comparison of the group of residents with definite anxiety (HAD-A  $\geq$   
37  
38 **205** 11) to those without definite anxiety (HAD-A < 11), disclosed the following variables as  
39  
40 **206** significantly associated with the prevalence of anxiety: higher age, married status (42% vs.  
41  
42 **207** 36.7%,  $p=0.027$ ), and female gender (66.7% vs. 56.2%,  $p<0.0001$ ) The fifth level of residency  
43  
44 **208** course (13.9% vs. 9.7%,  $p=0.009$ ), and the choice of medical/surgical specialties (15.9% vs.  
45  
46 **209** 10.8%,  $p=0.018$ ) were also significantly associated with anxiety. Medical specialties (45% vs.  
47  
48 **210** 54.2%,  $p < 0.0001$ ) were on the contrary associated with a lower risk of developing anxiety  
49  
50 **211** symptoms (Table II).

51  
52 **212** In comparison to residents without definite depression (HAD-D < 11), the group of residents  
53  
54 **213** with definite depression (HAD-D  $\geq$  11) were older, and more often married (45.7% vs. 36.2%,  
55  
56 **214**  $p<0.0001$ ). Moreover, surgical specialties associated with high-workload (22.9% vs. 17.5%,  
57  
58 **215**  $p=0.011$ ) were significantly associated with depressive symptoms in contrast to medical  
59  
60 **216** specialties (44.7 vs. 52.6%,  $p=0.003$ ) which were associated with lower depressive symptoms  
**217** (Table III). The number of shifts per month, and working hours per month were associated  
**218** with both anxiety and depressive cases (Table II and III).



1  
2  
3 219 The Poisson regression analysis disclosed the following variables as associated with total  
4 220 HAD score: age (OR = 1.014, 95% CI, 1.006-1.023, p = 0.001); female gender (OR = 1.114,  
5 221 95% CI, 1.083-1.145, p <0.0001); night shift number per month (OR = 1.048, 95% CI, 1.016-  
6 222 1.082, p = 0.03), working hours per week (OR = 1.008, 95% CI, 1.005-1.011, p = <0.0001) .  
7  
8  
9 223 Compared with medical specialties, medico-surgical ones were independently associated  
10 224 with a higher HAD score (OR = 1.459, 95% CI, 1.172-1.816, p = 0.001; fig 1).

11  
12  
13 225

14 226

15 227

16 228

17 229  
18  
19  
20  
21  
22  
23  
24  
25  
26  
27  
28  
29  
30  
31  
32  
33  
34  
35  
36  
37  
38  
39  
40  
41  
42  
43  
44  
45  
46  
47  
48  
49  
50  
51  
52  
53  
54  
55  
56  
57  
58  
59  
60

For peer review only

## 230 Discussion

231 This large survey encompassing 1700 out of the 2200 Tunisian medical residents  
232 brought together for the periodic process of choosing internship positions in their  
233 specialties, shows that 43.6% of them had definite criteria of anxiety, and 30.5% had  
234 depression. The diagnosis of anxiety or depression was probable in an additional 30% each.  
235 Higher scores of anxiety-depression were significantly associated with older age, female sex,  
236 and the heavy burden of work imposed on a weekly or monthly basis as reflected by the high  
237 number of weekly working hours, the number of night shifts per month, and the choice of a  
238 specialty with higher workload (surgical or medical-surgical specialty compared to medical  
239 specialty). Of interest, this survey unveils a very demanding health system imposed on  
240 Tunisian medical residents as reflected by the average working hours per week (60 hours),  
241 and the number of night shifts per month (6 on average regardless of the type of specialty),  
242 most often without a day of safety rest.

243 Although, mood disorders and physician distress are more prevalent among medical  
244 professionals compared to the general population, information is lacking about their  
245 prevalence in Tunisia<sup>5 23 24</sup>. This first survey on the subject in our country, enrolled 77% of  
246 potentially concerned medical residents, yielding a snapshot of the burden incurred by  
247 residents from all specialties in their everyday practice. The use of the French version of the  
248 HAD questionnaire should not be considered as a barrier to the residents' completion of the  
249 survey, because that is the language of all medical studies in the country.

250 International studies stressed the fact that medical residents usually have higher  
251 rates of depression than the general population<sup>15 25</sup>. Estimates of the prevalence of  
252 depression or depressive symptoms among resident physicians vary from 3% to 60% with a  
253 median of 28.8% according to a recent meta-analysis of 54 studies<sup>15</sup>. This proportion is lower  
254 than that recorded in our study whether we consider the rate of definite or probable  
255 depression (62%), or even when we only consider the cases qualifying for definite  
256 depression (30.5%). Of interest, this meta-analysis emphasized the difference in the  
257 methodological approach to address the issue of depression in medical residents (cross  
258 sectional studies to assess the prevalence vs longitudinal studies which inform on the  
259 incidence)<sup>15</sup>. The meta-analysis highlighted also the great variability in the instruments used  
260 (no less than 13 different instruments were used in the 54 studies)<sup>15</sup>. A prospective cohort

1  
2  
3 261 study conducted in Switzerland and using the HAD inventory used in our study disclosed a  
4 262 prevalence of anxiety in 30% of the second year residents, and 20% of the fourth and sixth  
5 263 year residents; depressive symptoms were present in 15% and 10%, respectively<sup>26</sup>. However,  
6 264 benchmarking with countries with socio-economic similarities could be more insightful. In a  
7 265 study including 118 residents from the American University of Beirut, 22% qualified for  
8 266 moderate to major depressive symptoms while only 8% had anxiety<sup>27</sup>. Moreover, in a cross  
9 267 sectional study conducted among residents of various specialties in Saudi Arabia, the  
10 268 prevalence of moderate to severe depressive symptoms was around 20%<sup>17</sup>.

11  
12  
13  
14  
15  
16  
17 269 Resident physicians share the same known causes of depression than the general  
18 270 population: physical health, lifestyle, marital status, history of previous depression,  
19 271 childhood issues, religiosity etc<sup>14</sup>. They have in addition specific factors according to the way  
20 272 the work is done, its everyday planning, and the constraints inherent to their career  
21 273 development<sup>4</sup>. These risk-factors correspond to the difficulty of their specialty,  
22 274 postgraduate year, stress at work, current rotation difficulty, working hours, shift number  
23 275 etc...<sup>4 15 28</sup>. In our study the Poisson regression model disclosed the following items as  
24 276 statistically associated with the occurrence of anxiety-depression: age, female sex, practice  
25 277 of a specialty generally accepted as very demanding and difficult, and the heavy burden of  
26 278 work imposed on a weekly or monthly basis as reflected by the weekly working hours, and  
27 279 the night-shift number per month. Most of these risk-factors have been reported elsewhere,  
28 280 or are intuitive, but it is their magnitude that makes this study important.

29  
30  
31  
32  
33  
34  
35  
36  
37  
38  
39 281 The occurrence of depression should be considered as a major event in the young  
40 282 physician's career or even life. It has been shown that once present, depression as well as  
41 283 burnout (another consequence of work-related chronic stress) may persist throughout the  
42 284 whole residency duration, or even beyond<sup>29 30</sup>. In a nationwide survey involving 3500  
43 285 Canadian physicians, Sullivan et al reported that 55% found that medicine as a profession  
44 286 impacted negatively on their family and personal life, while 65% reported that opportunities  
45 287 to change career despite dissatisfaction were limited<sup>31</sup>. Depression is also a source of  
46 288 decreased concentration at work, an increase in the rate of medical errors, work  
47 289 dissatisfaction and conflicts, impaired sleep quality, and a greater propensity to attrition,  
48 290 and even suicide ideation<sup>9 32 33</sup>.

1  
2  
3 291 Considering the high prevalence of anxiety and depression among Tunisian medical  
4 292 residents, every effort aiming at improving the mental health of young physicians should be  
5 293 encouraged. Any strategy should target both the individual level to amend the identified and  
6 294 potentially actionable risk-factors, and include more measures targeting the general  
7 295 organization of residents' work modalities, and their relationship with the hierarchy and  
8 296 administration.

9 297 The resident physician should first become aware of the mental health issue and seek help in  
10 298 particular those with a previous personal history of depression<sup>34</sup>. We did not investigate  
11 299 whether the participating residents sought for, or actually had psychological counseling, but  
12 300 we strongly believe that most did not. Structures able to provide aid to health professionals  
13 301 exposed to, and suffering from stress, anxiety, depression, are anyway non-existent in  
14 302 Tunisian hospitals. Our study suggests that such structures can no longer be considered an  
15 303 option, but the Ministry of Health should provide support at institutional level. At individual  
16 304 level, more generally accepted risk factors such as older age, gender, marital status,  
17 305 stressors outside of work, sleep deprivation, or lifestyle, require more personal attention  
18 306 and lifestyle education<sup>4</sup>. The current study was not designed to allow participants'  
19 307 identification so that they could be given individual information and act on it. Future studies  
20 308 targeting preferentially residents (or specialties) at high risk of anxiety, depression, or  
21 309 burnout, should consider such feedback for more specific training programs.

22 310 Residency program factors and the pace of work should also be better managed. While  
23 311 these details were totally non-existent in Tunisia, this has been recently fixed through a law  
24 312 issued on March 9, 2018 whose purpose is the definition of the status of Tunisian interns  
25 313 and residents<sup>35</sup>. This law, which has been torn out following long negotiations, and a strike  
26 314 that lasted more than 6 weeks, defines for the first time the role and duty of residents. The  
27 315 maximum number of weekly working hours and that of night shift frequency have been  
28 316 clearly defined and have been reduced to a maximum of 40 hours and two night shifts per  
29 317 week, respectively. A day of safety rest following every night shift has been rendered  
30 318 mandatory. Although still debated, the issue of work-hour restriction could be effective in  
31 319 reducing high emotional exhaustion, despite the fact that it carries the risk of alteration in  
32 320 the quality of care and education by reducing the number, and actual presence of medical  
33 321 residents<sup>36</sup>.

1  
2  
3 322 **Legend Figure1:** Risk Factors associated with Total HAD Score  
4

5 323 **Authors' contributions**  
6

7 324 Study Concept and design: MM and FA; Data Acquisition: MM; Analysis and interpretation of  
8 325 the data: MM, LOB, ZH, IO, FD, FA; All authors read and approved the final manuscript. MM  
9 326 and FA had full access to the data and take responsibility for its integrity and the accuracy of  
10 327 the analyses.  
11

12  
13 328 **Acknowledgements:** The authors are indebted to Ms Vaughn Khelifa and Pr Mahmoud Bchir  
14 329 for the Language editing of the manuscript  
15

16  
17 330 **Data Sharing statement:** dataset is available by contacting FA at f.abroug@rns.tn  
18

19 331

20 332  
21  
22  
23  
24  
25  
26  
27  
28  
29  
30  
31  
32  
33  
34  
35  
36  
37  
38  
39  
40  
41  
42  
43  
44  
45  
46  
47  
48  
49  
50  
51  
52  
53  
54  
55  
56  
57  
58  
59  
60

333 **Table I : Demographic and work characteristics of the study population (n=1700) :**

|                                                  |                                                 |              |
|--------------------------------------------------|-------------------------------------------------|--------------|
| <b>Sex ratio (M/F)</b>                           |                                                 | 667/1033     |
| <b>Age, med [IQR]</b>                            |                                                 | 28 [27 ; 30] |
| <b>Marital Status</b>                            | <b>Single, n(%)</b>                             | 1036 (61)    |
|                                                  | <b>Married, n(%)</b>                            | 655 (38.5)   |
|                                                  | <b>Divorced, n(%)</b>                           | 9 (0.5)      |
| <b>Number of Children</b>                        | <b>Zero, n(%)</b>                               | 343 (20.2)   |
|                                                  | <b>One, n(%)</b>                                | 235 (13.8)   |
|                                                  | <b>More than one, n(%)</b>                      | 86 (5.1)     |
| <b>Residency Level (year)</b>                    | <b>I, n(%)</b>                                  | 320 (18.8)   |
|                                                  | <b>II, n(%)</b>                                 | 410 (24.1)   |
|                                                  | <b>III, n(%)</b>                                | 434 (25.5)   |
|                                                  | <b>IV, n(%)</b>                                 | 340 (20)     |
|                                                  | <b>V, n(%)</b>                                  | 196 (11.5)   |
| <b>Specialty*</b>                                | <b>Medical, n(%)</b>                            | 854 (50.2)   |
|                                                  | <b>Medical and Surgical, n(%)</b>               | 221 (13%)    |
|                                                  | <b>High-workload Medical specialties, n(%)</b>  | 299 (17.6)   |
|                                                  | <b>High-workload Surgical specialties, n(%)</b> | 326 (19.2)   |
| <b>Working hours per week, med [IQR]</b>         |                                                 | 60 [48 ; 76] |
| <b>Night shifts per month, med [IQR]</b>         |                                                 | 6 [4 ; 7]    |
| <b>Recovery day following night shift, n (%)</b> |                                                 | 98 (8)       |

334

335 *\*Specialties were split into four categories according to everyday difficulties: medical*  
 336 *(example dermatology, pulmonology, rheumatology, neurology, psychiatry, fundamental specialties*  
 337 *like histology, physiology etc) ; medical and surgical (example: ophthalmology, gynecology-obstetrics,*  
 338 *otorhinolaryngology etc); high-workload medical (example: critical care medicine, anesthesiology,*  
 339 *emergency medicine, cardiology), and high-workload surgical specialties (surgery, pediatric surgery,*  
 340 *orthopedics, neurosurgery, urology, cardiovascular surgery etc).*

341

342 **Table II : Demographic and workload characteristics and their association with anxiety :**

|                                           | No Anxiety | Definite Anxiety | <i>p</i>      |
|-------------------------------------------|------------|------------------|---------------|
| <b><i>n</i> (%)</b>                       | 958 (56.4) | 742 (43.6)       |               |
| <b>Age, mean±SD</b>                       | 28.5±1.9   | 28.7±2           | <b>0.008</b>  |
| <b>Gender</b>                             |            |                  | <b>0.0001</b> |
| <b>Male</b>                               | 420 (43.8) | 247 (33.3)       |               |
| <b>Female</b>                             | 538 (56.2) | 495 (66.7)       |               |
| <b>Marital Status</b>                     |            |                  | <b>0.027</b>  |
| <b>Single</b>                             | 606 (63.3) | 430 (58)         |               |
| <b>Married</b>                            | 352 (36.7) | 312 (42)         |               |
| <b>Level of Residency</b>                 |            |                  | <b>0.005</b>  |
| <b>I</b>                                  | 188 (19.6) | 132 (17.8)       |               |
| <b>II</b>                                 | 244 (25.5) | 166 (22.4)       |               |
| <b>III</b>                                | 251 (26.2) | 183 (24.7)       |               |
| <b>IV</b>                                 | 182 (19)   | 158 (21.3)       |               |
| <b>V</b>                                  | 93 (9.7)   | 103 (13.9)       |               |
| <b>Specialty</b>                          |            |                  | <b>0.018</b>  |
| <b>Medical</b>                            | 519 (54.2) | 334 (45)         |               |
| <b>Medical and Surgical</b>               | 103 (10.8) | 118 (15.9)       |               |
| <b>High-workload Surgical specialties</b> | 181 (18.9) | 145 (19.5)       |               |
| <b>High-workload Medical specialties</b>  | 155 (16.2) | 145 (19.5)       |               |
| <b>Shifts/month, mean±SD</b>              | 4.9±3      | 6±2.9            | <b>0.0001</b> |
| <b>Working Hours/week, mean±SD</b>        | 58.8±20    | 66.4±20          | <b>0.0001</b> |

343

344

345 **Table III** : Demographic and workload characteristics and association with depression cases

|                                    | No depression | Definite depression | <i>p</i>      |
|------------------------------------|---------------|---------------------|---------------|
| N (%)                              | 1181 (69.5)   | 519 (30.5)          |               |
| Age, mean±SD                       | 28.3±1.8]     | 29±2                | <b>0.007</b>  |
| Gender                             |               |                     | 0.11          |
| Male                               | 453 (38.4)    | 214 (41.2)          |               |
| Female                             | 728 (61.6)    | 305 (58.8)          |               |
| Marital Status                     |               |                     | <b>0.0001</b> |
| Single                             | 754 (63.8)    | 282 (54.3)          |               |
| Married                            | 427 (36.2)    | 237 (45.7)          |               |
| Level of Residency                 |               |                     | <b>0.0001</b> |
| I                                  | 263 (22.3)    | 57 (11)             |               |
| II                                 | 292 (24.7)    | 118 (22.7)          |               |
| III                                | 294 (24.9)    | 140 (27)            |               |
| IV                                 | 218 (18.5)    | 122 (23.5)          |               |
| V                                  | 114 (9.7)     | 82 (15.8)           |               |
| Specialty                          |               |                     | <b>0.006</b>  |
| Medical                            | 621 (52.6)    | 232 (44.7)          |               |
| Medical and Surgical               | 156 (13.2)    | 65 (12.5)           |               |
| High-workload Surgical specialties | 207 (17.5)    | 119 (22.9)          |               |
| High-workload Medical specialties  | 197 (16.7)    | 103 (19.8)          |               |
| Shifts/month, mean±SD]             | 5±3           | 6±2.9               | <b>0.0001</b> |
| Working Hours/week, med [IQR]      | 60±20         | 66±20               | <b>0.0001</b> |

346

347



348 **References**

- 349 1. Shanafelt TD, Sloan JA, Habermann TM. The well-being of physicians. *Am J*  
350 *Med* 2003;**114**(6):513-9.
- 351 2. Hsu K, Marshall V. Prevalence of depression and distress in a large sample of  
352 Canadian residents, interns, and fellows. *Am J Psychiatry*  
353 1987;**144**(12):1561-6.
- 354 3. Rotenstein LS, Ramos MA, Torre M, et al. Prevalence of Depression,  
355 Depressive Symptoms, and Suicidal Ideation Among Medical Students: A  
356 Systematic Review and Meta-Analysis. *JAMA* 2016;**316**(21):2214-36.
- 357 4. Joules N, Williams, D. and Thompson, A. Depression in Resident Physicians: A  
358 Systematic Review. . *Open Journal of Depression* 2014;**3**:898-100.
- 359 5. Sen S, Kranzler HR, Krystal JH, et al. A prospective cohort study investigating  
360 factors associated with depression during medical internship. *Arch Gen*  
361 *Psychiatry* 2010;**67**(6):557-65.
- 362 6. Rama-Maceiras P, Jokinen J, Kranke P. Stress and burnout in anaesthesia: a  
363 real world problem? *Curr Opin Anaesthesiol* 2015;**28**(2):151-8.
- 364 7. Amaddeo F, Jones J. What is the impact of socio-economic inequalities on  
365 the use of mental health services? *Epidemiologia e psichiatria sociale*  
366 2007;**16**(1):16-9.
- 367 8. Donisi V, Tedeschi F, Percudani M, et al. Prediction of community mental  
368 health service utilization by individual and ecological level socio-  
369 economic factors. *Psychiatry research* 2013;**209**(3):691-8.
- 370 9. Fahrenkopf AM, Sectish TC, Barger LK, et al. Rates of medication errors  
371 among depressed and burnt out residents: prospective cohort study.  
372 *BMJ* 2008;**336**(7642):488-91.
- 373 10. Ripp J, Babyatsky M, Fallar R, et al. The incidence and predictors of job  
374 burnout in first-year internal medicine residents: a five-institution study.  
375 *Academic medicine : journal of the Association of American Medical*  
376 *Colleges* 2011;**86**(10):1304-10.
- 377 11. Tsai YC, Liu CH. Factors and symptoms associated with work stress and  
378 health-promoting lifestyles among hospital staff: a pilot study in Taiwan.  
379 *BMC health services research* 2012;**12**:199.
- 380 12. de Oliveira GS, Jr., Chang R, Fitzgerald PC, et al. The prevalence of burnout  
381 and depression and their association with adherence to safety and  
382 practice standards: a survey of United States anesthesiology trainees.  
383 *Anesth Analg* 2013;**117**(1):182-93.
- 384 13. Lebensohn P, Dodds S, Benn R, et al. Resident wellness behaviors:  
385 relationship to stress, depression, and burnout. *Family medicine*  
386 2013;**45**(8):541-9.

- 1  
2  
3 387 14. van der Heijden F, Dillingh G, Bakker A, et al. Suicidal thoughts among  
4 388 medical residents with burnout. Archives of suicide research : official  
5 389 journal of the International Academy for Suicide Research  
6 390 2008;**12**(4):344-6.
- 7  
8 391 15. Mata DA, Ramos MA, Bansal N, et al. Prevalence of Depression and  
9 392 Depressive Symptoms Among Resident Physicians: A Systematic Review  
10 393 and Meta-analysis. JAMA 2015;**314**(22):2373-83.
- 11  
12 394 16. Waldman SV, Diez JC, Arazi HC, et al. Burnout, perceived stress, and  
13 395 depression among cardiology residents in Argentina. Acad Psychiatry  
14 396 2009;**33**(4):296-301.
- 15  
16 397 17. Al-Maddah EM, Al-Dabal BK, Khalil MS. Prevalence of Sleep Deprivation and  
17 398 Relation with Depressive Symptoms among Medical Residents in King  
18 399 Fahd University Hospital, Saudi Arabia. Sultan Qaboos University medical  
19 400 journal 2015;**15**(1):e78-84.
- 20  
21 401 18. Shashikantha S K SMP. Prevalence of depression among post graduate  
22 402 residents in a tertiary health care institute, Haryana. International  
23 403 Journal of Medical Science and Public Health 2016;**5**(10):2139-42.
- 24  
25 404 19. program UnD. 2016 HDR Report 2016 [Available from:  
26 405 <http://hdr.undp.org/en/composite/trends>.
- 27  
28 406 20. Chaabouni.S AC. The governance structure and regulation in Tunisian public  
29 407 hospitals. International Journal of Social and Behavioural Sciences  
30 408 2013;**1**(8):162-67.
- 31  
32 409 21. Out-of-pocket health expenditure (% of private expenditure on health) In:  
33 410 database WHOGHE, ed.: World Health Organization Global Health  
34 411 Expenditure database, 2018.
- 35  
36 412 22. Zigmond AS, Snaith RP. The hospital anxiety and depression scale. Acta  
37 413 psychiatrica Scandinavica 1983;**67**(6):361-70.
- 38  
39 414 23. Kessler RC, Berglund P, Demler O, et al. Lifetime prevalence and age-of-  
40 415 onset distributions of DSM-IV disorders in the National Comorbidity  
41 416 Survey Replication. Archives of general psychiatry 2005;**62**(6):593-602.
- 42  
43 417 24. Dyrbye LN, Thomas MR, Shanafelt TD. Systematic review of depression,  
44 418 anxiety, and other indicators of psychological distress among U.S. and  
45 419 Canadian medical students. Academic medicine : journal of the  
46 420 Association of American Medical Colleges 2006;**81**(4):354-73.
- 47  
48 421 25. Schneider SE, Phillips WM. Depression and anxiety in medical, surgical, and  
49 422 pediatric interns. Psychol Rep 1993;**72**(3 Pt 2):1145-6.
- 50  
51 423 26. Buddeberg-Fischer B, Stamm M, Buddeberg C, et al. [Anxiety and  
52 424 depression in residents - results of a Swiss longitudinal study]. Z  
53 425 Psychosom Med Psychother 2009;**55**(1):37-50.

- 1  
2  
3 426 27. Talih F, Warakian R, Ajaltouni J, et al. Correlates of Depression and Burnout  
4 427 Among Residents in a Lebanese Academic Medical Center: a Cross-  
5 428 Sectional Study. *Acad Psychiatry* 2016;**40**(1):38-45.
- 7 429 28. Kirsling RA, Kochar MS, Chan CH. An evaluation of mood states among first-  
8 430 year residents. *Psychol Rep* 1989;**65**(2):355-66.
- 10 431 29. Girard DE, Hickam DH, Gordon GH, et al. A prospective study of internal  
11 432 medicine residents' emotions and attitudes throughout their training.  
12 433 *Acad Med* 1991;**66**(2):111-4.
- 14 434 30. Roh MS, Jeon HJ, Kim H, et al. The prevalence and impact of depression  
15 435 among medical students: a nationwide cross-sectional study in South  
16 436 Korea. *Acad Med* 2010;**85**(8):1384-90.
- 18 437 31. Sullivan P, Buske L. Results from CMAA's huge 1998 physician survey point to  
19 438 a dispirited profession. *CMAJ* 1998;**159**(5):525-8.
- 21 439 32. Khoushhal Z, Hussain MA, Greco E, et al. Prevalence and Causes of Attrition  
22 440 Among Surgical Residents: A Systematic Review and Meta-analysis. *JAMA*  
23 441 *Surg* 2017;**152**(3):265-72.
- 25 442 33. West CP, Huschka MM, Novotny PJ, et al. Association of perceived medical  
26 443 errors with resident distress and empathy: a prospective longitudinal  
27 444 study. *JAMA* 2006;**296**(9):1071-8.
- 29 445 34. Goebert D, Thompson D, Takeshita J, et al. Depressive symptoms in medical  
30 446 students and residents: a multischool study. *Acad Med* 2009;**84**(2):236-  
31 447 41.
- 33 448 35. Health TMO. Bylaw of Medical Interns and Residents: Journal Officiel de la  
34 449 République Tunisienne; 2018 [Journal Officiel de La République  
35 450 Tunisienne:[Available from:  
36 451 [http://www.legislation.tn/fr/recherche/jort/date\\_jort\\_deb/09-03-2018](http://www.legislation.tn/fr/recherche/jort/date_jort_deb/09-03-2018).  
37 452 36. Gopal R, Glasheen JJ, Miyoshi TJ, et al. Burnout and internal medicine  
38 453 resident work-hour restrictions. *Arch Intern Med* 2005;**165**(22):2595-  
39 454 600.
- 42 455

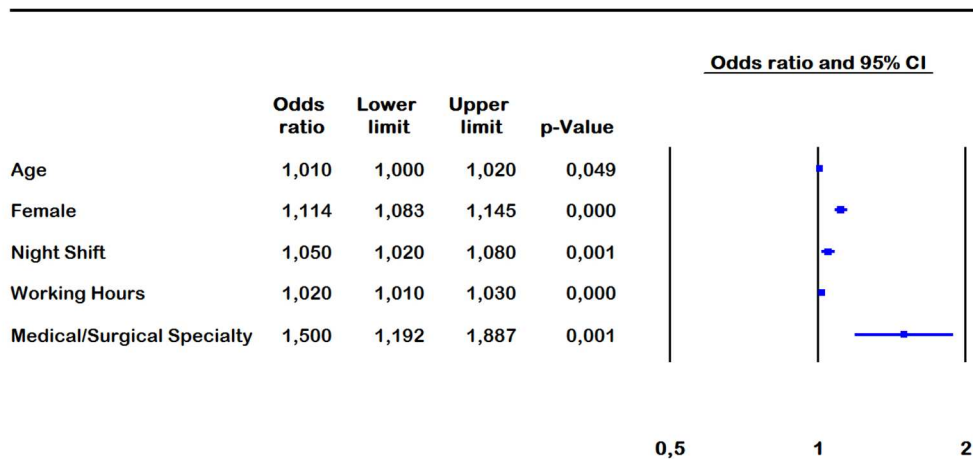

Figure1: Risk factors

114x52mm (300 x 300 DPI)

STROBE Statement—Checklist of items that should be included in reports of *cross-sectional studies*

|                              | Item No | Recommendation                                                                                                                                                                                               |         |
|------------------------------|---------|--------------------------------------------------------------------------------------------------------------------------------------------------------------------------------------------------------------|---------|
| <b>Title and abstract</b>    | 1       | (a) Indicate the study's design with a commonly used term in the title or the abstract                                                                                                                       | X       |
|                              |         | (b) Provide in the abstract an informative and balanced summary of what was done and what was found                                                                                                          | X       |
| <b>Introduction</b>          |         |                                                                                                                                                                                                              |         |
| Background/rationale         | 2       | Explain the scientific background and rationale for the investigation being reported                                                                                                                         | P2      |
| Objectives                   | 3       | State specific objectives, including any prespecified hypotheses                                                                                                                                             | P2      |
| <b>Methods</b>               |         |                                                                                                                                                                                                              |         |
| Study design                 | 4       | Present key elements of study design early in the paper                                                                                                                                                      | P5      |
| Setting                      | 5       | Describe the setting, locations, and relevant dates, including periods of recruitment, exposure, follow-up, and data collection                                                                              | P5      |
| Participants                 | 6       | (a) Give the eligibility criteria, and the sources and methods of selection of participants                                                                                                                  | P5      |
| Variables                    | 7       | Clearly define all outcomes, exposures, predictors, potential confounders, and effect modifiers. Give diagnostic criteria, if applicable                                                                     | P6      |
| Data sources/<br>measurement | 8*      | For each variable of interest, give sources of data and details of methods of assessment (measurement). Describe comparability of assessment methods if there is more than one group                         | P6      |
| Bias                         | 9       | Describe any efforts to address potential sources of bias                                                                                                                                                    | P6      |
| Study size                   | 10      | Explain how the study size was arrived at                                                                                                                                                                    | P7      |
| Quantitative variables       | 11      | Explain how quantitative variables were handled in the analyses. If applicable, describe which groupings were chosen and why                                                                                 | P7      |
| Statistical methods          | 12      | (a) Describe all statistical methods, including those used to control for confounding                                                                                                                        | P7      |
|                              |         | (b) Describe any methods used to examine subgroups and interactions                                                                                                                                          | NA      |
|                              |         | (c) Explain how missing data were addressed                                                                                                                                                                  | P7      |
|                              |         | (d) If applicable, describe analytical methods taking account of sampling strategy                                                                                                                           | NA      |
|                              |         | (e) Describe any sensitivity analyses                                                                                                                                                                        | P7      |
| <b>Results</b>               |         |                                                                                                                                                                                                              |         |
| Participants                 | 13*     | (a) Report numbers of individuals at each stage of study—eg numbers potentially eligible, examined for eligibility, confirmed eligible, included in the study, completing follow-up, and analysed            | P8      |
|                              |         | (b) Give reasons for non-participation at each stage                                                                                                                                                         | P8      |
|                              |         | (c) Consider use of a flow diagram                                                                                                                                                                           | NA      |
| Descriptive data             | 14*     | (a) Give characteristics of study participants (eg demographic, clinical, social) and information on exposures and potential confounders                                                                     | Table I |
|                              |         | (b) Indicate number of participants with missing data for each variable of interest                                                                                                                          | NA      |
| Outcome data                 | 15*     | Report numbers of outcome events or summary measures                                                                                                                                                         | P8      |
| Main results                 | 16      | (a) Give unadjusted estimates and, if applicable, confounder-adjusted estimates and their precision (eg, 95% confidence interval). Make clear which confounders were adjusted for and why they were included | P8      |

|                          |    |                                                                                                                                                                            |        |
|--------------------------|----|----------------------------------------------------------------------------------------------------------------------------------------------------------------------------|--------|
|                          |    | (b) Report category boundaries when continuous variables were categorized                                                                                                  | P8     |
|                          |    | (c) If relevant, consider translating estimates of relative risk into absolute risk for a meaningful time period                                                           | NA     |
| Other analyses           | 17 | Report other analyses done—eg analyses of subgroups and interactions, and sensitivity analyses                                                                             | P9     |
| <b>Discussion</b>        |    |                                                                                                                                                                            |        |
| Key results              | 18 | Summarise key results with reference to study objectives                                                                                                                   | P10    |
| Limitations              | 19 | Discuss limitations of the study, taking into account sources of potential bias or imprecision. Discuss both direction and magnitude of any potential bias                 | P10    |
| Interpretation           | 20 | Give a cautious overall interpretation of results considering objectives, limitations, multiplicity of analyses, results from similar studies, and other relevant evidence | P10-11 |
| Generalisability         | 21 | Discuss the generalisability (external validity) of the study results                                                                                                      | P11    |
| <b>Other information</b> |    |                                                                                                                                                                            |        |
| Funding                  | 22 | Give the source of funding and the role of the funders for the present study and, if applicable, for the original study on which the present article is based              | P1     |

\*Give information separately for exposed and unexposed groups.

**Note:** An Explanation and Elaboration article discusses each checklist item and gives methodological background and published examples of transparent reporting. The STROBE checklist is best used in conjunction with this article (freely available on the Web sites of PLoS Medicine at <http://www.plosmedicine.org/>, Annals of Internal Medicine at <http://www.annals.org/>, and Epidemiology at <http://www.epidem.com/>). Information on the STROBE Initiative is available at [www.strobe-statement.org](http://www.strobe-statement.org).
